# Supplementary material for: Air Passenger Preferences: An International Comparison Affects Boarding Theory
Source: Atypon-hosted journal article supplement (doi:10.1287/opre.2021.2148), 2021-11-04
Supplement: opre.2021.2148.sm1.pdf [file opre.2021.2148.sm1.pdf]

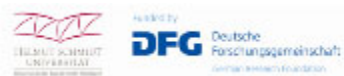

---

boarding2020 → Boarding

03.01.2020, 09:56

**Seite 01**

Dear participant,

First of all, thank you very much for participating in our survey!

The department of Business Administration with a focus on Management Science and Operations Research is conducting this survey as part of an international research project dealing with the **boarding of aircraft**. In the following, we would like to find out what your preferences and behavioral patterns are when boarding an aircraft.

This survey aims at finding out how the boarding process can be improved in terms of time and also passenger convenience.

The boarding process includes the **ticket control** at the gate (usually automated ticket check with a turnstile), the **walk through the passenger bridge** to the aircraft and **taking the seat** in the aircraft. The check-in, baggage drop-off and security control are not part of this process.

---

**Seite 02**

### 1. Which gender are you?

- Female  
 Male  
 Other

### 2. Age

I am \_\_\_\_\_ years old.

---

**Seite 03**

**3. How often have you flown in the last 12 months (round trips count as two flights)?**

Please answer the question separately for private and business flights.

Private flights: ⓘ

[Please choose]

Business flights: ⓘ

[Please choose]

question('FV03')

## Business flights

You have stated that you have only flown for business purposes in the last 12 months.

We would therefore ask you to answer all of the following questions in this questionnaire relating to your **job-related flights** (business trips or flights due to your professional activity).

question('FV02')

## Private flights

You have stated that you have only flown privately in the last 12 months.

We would therefore ask you to answer all of the following questions in this questionnaire relating to your **privately taken flights** (holiday flights, flights with family,...).

question('FV05')

## Business flights

You have stated that you fly both privately and for business. We would ask you to answer all of the following questions in this questionnaire in relation to your **job-related flights** (business trips or flights due to your professional activity).

question('FV04')

## Private flights

You have stated that you fly both privately and for business. We would ask you to answer all of the following questions of this questionnaire regarding your **privately taken flights** (holiday flights, flights with family, ...).

**4. I mostly fly ...**

- alone
- as a couple
- in a group of maximum 5 people
- in a group of at least 6 people

**question('FV07')****5. I mostly fly ...**

If there are several children, please indicate the youngest child

- without children
- with at least one child under the age of 3 years
- with at least one child under the age of 6 years
- with at least one child under the age of 12 years
- with at least one child above the age of 12 years

**6. I fly ...**

- mainly short- and medium-distance flights (maximum flight time approx. 7 hours)
- mainly long-distance flights (at least approx. 7 hours flight time)
- approx. equal numbers of short- or medium-distance and long-distance flights

**7. Which airline do you particularly enjoy flying with?**

Please select a maximum of three airlines you prefer to fly with.

- Aeroflot
- Air France
- Air India
- American Airlines
- British Airways
- Delta Air Lines
- EasyJet
- El Al
- Emirates
- Ethiopian Airlines
- Eurowings
- Iberia
- JetBlue Airways
- KLM
- Lufthansa
- Norwegian
- Ryanair
- SAS Scandinavian Airlines
- Southwest Airlines
- Spirit Airlines
- SWISS
- Turkish Airlines
- United Airlines
- Wizz Air
- Other, namely:

- 
- No preference

**8. I mostly fly ...**

- Economy Class/Coach 
- Premium Economy Class
- Business Class
- First Class
- Other, namely:

question('FV11')

**9. What is the maximum amount you would be willing to pay for a round trip domestic flight to your holiday destination (e.g., from Chicago, IL to Miami, FL or similar)?**

[Please choose]

**10. How important are the following factors to you when flying?**

Please indicate the importance of each of the factors listed below.

|                                                                                                                                                | not important<br>at all                                                               | very<br>important     |                       |
|------------------------------------------------------------------------------------------------------------------------------------------------|---------------------------------------------------------------------------------------|-----------------------|-----------------------|
|                                                                                                                                                | 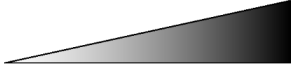 |                       | I don't know          |
| Service on board                                                                                                                               | <input type="radio"/>                                                                 | <input type="radio"/> | <input type="radio"/> |
| Direct flight (especially for short- and medium-distance flights)                                                                              | <input type="radio"/>                                                                 | <input type="radio"/> | <input type="radio"/> |
| Punctuality of the flight                                                                                                                      | <input type="radio"/>                                                                 | <input type="radio"/> | <input type="radio"/> |
| Frequent Flyer Programs                                                                                                                        | <input type="radio"/>                                                                 | <input type="radio"/> | <input type="radio"/> |
| Fast boarding of the plane                                                                                                                     | <input type="radio"/>                                                                 | <input type="radio"/> | <input type="radio"/> |
| Space for carry-on baggage                                                                                                                     | <input type="radio"/>                                                                 | <input type="radio"/> | <input type="radio"/> |
| Catering on board                                                                                                                              | <input type="radio"/>                                                                 | <input type="radio"/> | <input type="radio"/> |
| Comfort on board                                                                                                                               | <input type="radio"/>                                                                 | <input type="radio"/> | <input type="radio"/> |
| Price                                                                                                                                          | <input type="radio"/>                                                                 | <input type="radio"/> | <input type="radio"/> |
| Clear procedures during the entire flight handling process  | <input type="radio"/>                                                                 | <input type="radio"/> | <input type="radio"/> |
| Entertainment                                               | <input type="radio"/>                                                                 | <input type="radio"/> | <input type="radio"/> |

Other, namely:

---

The following questions refer to **short- and medium-distance flights** (up to approx. 7 hours flight time), i.e., not to long-distance flights. Usually the airplanes used here have one middle aisle and three seats per row on each side of the aisle.

**question('G002')**

Please remember to answer the questions still relating to your **privately taken flights** (holiday flights, flights with family,...).

**question('G003')**

Please remember to answer the questions still relating to your **job-related flights** (business trips or flights due to your professional activity).

**11. Concerning my main luggage item ...**

- ... I prefer to check it in as checked baggage.
- ... I prefer to take it into the cabin as carry-on baggage.

- 
- It depends on the reason for the flight.

**12. I am willing to pay extra for my checked baggage.**

[Please choose]

**13. I am willing to pay extra for additional carry-on baggage.**

[Please choose]

**14. I usually have a lot of carry-on baggage when I fly.**

- Yes
- No

- 
- I don't know

**15. On a typical flight for me I usually have the following carry-on baggage:**

Please indicate here which pieces of baggage you take into the aircraft cabin. If this differs from flight to flight, please think about your last flight. Checked baggage that is handed in at check-in should not be taken into account here.

Multiple selection possible

- Carry-on baggage suitcase
- Small backpack
- Large backpack
- Purse
- Plastic bag
- Laptop bag
- Travel bag
- Other, namely:

**16. Concerning my carry-on baggage ...**

For each statement, please indicate to what extent you agree.

completely  
disagree

completely  
agree

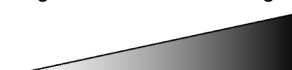

I don't know

... I prefer to stow it in the overhead bins above the seats.

... I prefer to stow it under the front seat.

... I am happy to drop it off at the door of the plane, if I am asked to do so, in order to pick it up again at the baggage claim at my destination. 

... I am happy to drop it off at the door of the plane, if I am asked to do so, if I get it back at my destination directly at the aircraft door when I get off the plane.

## Airplane seat

There are different ways of reserving seats with different airlines. One extreme case is the so-called open seating, where there are no reservations at all and each passenger can simply choose any seat when boarding.

Some airlines charge additional fees if you want to choose your own seat when booking your flight while the remaining seats are then assigned to the passengers who do not want to pay anything extra. Here it can happen that you cannot sit next to your fellow traveler.

### 17. How important are the following aspects to you in regard to seating?

Please indicate the importance of each of the factors listed below.

|                                                                                                               | not important<br>at all |  |                       |                       |                       |                       | very<br>important     |                       |                       |
|---------------------------------------------------------------------------------------------------------------|-------------------------|-------------------------------------------------------------------------------------|-----------------------|-----------------------|-----------------------|-----------------------|-----------------------|-----------------------|-----------------------|
| To have a reserved seat on the plane                                                                          | <input type="radio"/>   | <input type="radio"/>                                                               | <input type="radio"/> | <input type="radio"/> | <input type="radio"/> | <input type="radio"/> | <input type="radio"/> | I don't know          | <input type="radio"/> |
| No extra charge for the seat                                                                                  | <input type="radio"/>   | <input type="radio"/>                                                               | <input type="radio"/> | <input type="radio"/> | <input type="radio"/> | <input type="radio"/> | <input type="radio"/> | <input type="radio"/> | <input type="radio"/> |
| To be able to choose whether I sit at the window, in the middle or at the aisle                               | <input type="radio"/>   | <input type="radio"/>                                                               | <input type="radio"/> | <input type="radio"/> | <input type="radio"/> | <input type="radio"/> | <input type="radio"/> | <input type="radio"/> | <input type="radio"/> |
| To be able to choose my seat myself                                                                           | <input type="radio"/>   | <input type="radio"/>                                                               | <input type="radio"/> | <input type="radio"/> | <input type="radio"/> | <input type="radio"/> | <input type="radio"/> | <input type="radio"/> | <input type="radio"/> |
| Knowing where I will be sitting before boarding the plane                                                     | <input type="radio"/>   | <input type="radio"/>                                                               | <input type="radio"/> | <input type="radio"/> | <input type="radio"/> | <input type="radio"/> | <input type="radio"/> | <input type="radio"/> | <input type="radio"/> |
| Knowing where I will be sitting at least an hour before departure                                             | <input type="radio"/>   | <input type="radio"/>                                                               | <input type="radio"/> | <input type="radio"/> | <input type="radio"/> | <input type="radio"/> | <input type="radio"/> | <input type="radio"/> | <input type="radio"/> |
| If I am traveling together with other people, to sit directly next to my fellow traveler                      | <input type="radio"/>   | <input type="radio"/>                                                               | <input type="radio"/> | <input type="radio"/> | <input type="radio"/> | <input type="radio"/> | <input type="radio"/> | <input type="radio"/> | <input type="radio"/> |
| If I am traveling together with other people, to be able to board the plane together with my fellow travelers | <input type="radio"/>   | <input type="radio"/>                                                               | <input type="radio"/> | <input type="radio"/> | <input type="radio"/> | <input type="radio"/> | <input type="radio"/> | <input type="radio"/> | <input type="radio"/> |

**18. I prefer to sit ...**

Please answer the question regarding an airplane with a central aisle and three seats per side. Multiple selection possible

- ... at the window
- ... in the middle
- ... at the aisle

---

I don't care.

**19. I prefer to sit ...**

- ... in the front part of the plane
- ... in the rear of the plane

---

I don't care.

**20. I am willing to pay extra for a seat reservation.**

Imagine you have already checked in, dropped off your baggage (if desired), gone through the security check and reached your departure gate.

**Now the boarding process begins.** It includes the ticket control at the gate (usually at automatic turnstiles), walking across the passenger boarding bridge to the aircraft door, boarding the aircraft, stowing the carry-on baggage and taking your seat on the aircraft. (**Boarding via buses is not considered here**).

**question('G002')**

Please remember to answer the questions still relating to your **privately taken flights** (holiday flights, flights with family,...).

**question('G003')**

Please remember to answer the questions still relating to your **job-related flights** (business trips or flights due to your professional activity).

**21. I perceive the boarding process in most cases as ...**

For each feature listed below, please indicate to what extent you agree.

|                    | completely<br>disagree |  |                       |                       |                       |                       | completely<br>agree   | I don't know |
|--------------------|------------------------|---------------------------------------------------------------------------------------|-----------------------|-----------------------|-----------------------|-----------------------|-----------------------|--------------|
| ... well-organized | <input type="radio"/>  | <input type="radio"/>                                                                 | <input type="radio"/> | <input type="radio"/> | <input type="radio"/> | <input type="radio"/> | <input type="radio"/> |              |
| ... confusing      | <input type="radio"/>  | <input type="radio"/>                                                                 | <input type="radio"/> | <input type="radio"/> | <input type="radio"/> | <input type="radio"/> | <input type="radio"/> |              |
| ... time-consuming | <input type="radio"/>  | <input type="radio"/>                                                                 | <input type="radio"/> | <input type="radio"/> | <input type="radio"/> | <input type="radio"/> | <input type="radio"/> |              |
| ... exhausting     | <input type="radio"/>  | <input type="radio"/>                                                                 | <input type="radio"/> | <input type="radio"/> | <input type="radio"/> | <input type="radio"/> | <input type="radio"/> |              |
| ... unpleasant     | <input type="radio"/>  | <input type="radio"/>                                                                 | <input type="radio"/> | <input type="radio"/> | <input type="radio"/> | <input type="radio"/> | <input type="radio"/> |              |

**22. How important are the following factors to you when boarding aircraft?**

Please indicate the importance of each of the factors listed below.

|                                                             | not important<br>at all |                       |                       |                       |                       |                       |                       | very<br>important     |  | I don't know          |
|-------------------------------------------------------------|-------------------------|-----------------------|-----------------------|-----------------------|-----------------------|-----------------------|-----------------------|-----------------------|--|-----------------------|
|                                                             |                         |                       |                       |                       |                       |                       |                       |                       |  |                       |
| Well-organized handling of the boarding process             | <input type="radio"/>   | <input type="radio"/> | <input type="radio"/> | <input type="radio"/> | <input type="radio"/> | <input type="radio"/> | <input type="radio"/> | <input type="radio"/> |  | <input type="radio"/> |
| No long waiting periods on the plane (after sitting down)   | <input type="radio"/>   | <input type="radio"/> | <input type="radio"/> | <input type="radio"/> | <input type="radio"/> | <input type="radio"/> | <input type="radio"/> | <input type="radio"/> |  | <input type="radio"/> |
| No long queues when getting in                              | <input type="radio"/>   | <input type="radio"/> | <input type="radio"/> | <input type="radio"/> | <input type="radio"/> | <input type="radio"/> | <input type="radio"/> | <input type="radio"/> |  | <input type="radio"/> |
| Friendly staff                                              | <input type="radio"/>   | <input type="radio"/> | <input type="radio"/> | <input type="radio"/> | <input type="radio"/> | <input type="radio"/> | <input type="radio"/> | <input type="radio"/> |  | <input type="radio"/> |
| Punctual start of boarding (as stated on the boarding pass) | <input type="radio"/>   | <input type="radio"/> | <input type="radio"/> | <input type="radio"/> | <input type="radio"/> | <input type="radio"/> | <input type="radio"/> | <input type="radio"/> |  | <input type="radio"/> |
| Clear and easily comprehensible announcements               | <input type="radio"/>   | <input type="radio"/> | <input type="radio"/> | <input type="radio"/> | <input type="radio"/> | <input type="radio"/> | <input type="radio"/> | <input type="radio"/> |  | <input type="radio"/> |

**23. Please imagine that you have a reserved seat and there are no restrictions on which groups of passengers may board first. How do you normally behave?**

I prefer to get on the plane ...

- ... at the beginning of the boarding process.  
 ... towards the end of the boarding process.

I don't care.

**24. I am willing to pay extra to be able to board the plane before the other regular passengers.**

[Please choose]

**25. Waiting in the following situation bothers me a lot.**

For each situation listed, please indicate to what extent you agree.

completely  
disagree

completely  
agree

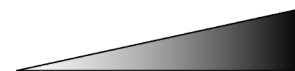

I don't know

The waiting time in the waiting area at the departure gate until boarding begins (if boarding starts as scheduled)

The additional waiting time in the waiting area at the departure gate until boarding begins (if boarding is delayed)

At the departure gate in the queue before the ticket check

In the passenger bridge on the way to the plane

Standing in the middle aisle of the airplane

On my seat in the airplane until take-off

**26. Personal waiting time vs. total boarding time**

The term boarding time can be understood to mean both, your **personal boarding time** and the **total boarding time** of the flight.

**Personal boarding time:** waiting time in the queue at the gate, in the bridge and in the aircraft (standing or walking)

**Total boarding time:** personal boarding time + time sitting in the waiting area at the gate (while other passengers are already boarding) + time sitting on the seat in the aircraft (while other passengers are still boarding)

**Assuming the plane takes off on time in any case. Which do you prefer?**

- A **short personal** boarding time (the time you spend standing or walking in the queues), but a **longer total boarding time** (i.e., longer sitting at the gate or in the aircraft)
- A **longer personal** boarding time (longer standing at the gate, in the bridge or in the aircraft in the middle aisle), but a **short waiting time** before and after

---

I don't care.

**27. Now please assume that the departure time of the aircraft may be influenced. Which do you prefer:**

- A **short personal** boarding time, but a **longer total boarding time** and possibly a delayed departure
- A **longer personal** boarding time, but a **short waiting time** before and after and a departure on time

---

I don't care.

Some airlines allow passengers to board in **different groups**. Depending on their seat, some passengers may board earlier, some later. However, they always have the option of boarding later than their group.

For example, a division into two boarding groups would mean that all passengers sitting in the rear half of the aircraft board first and only then the passengers sitting in the front half.

However, some airlines do **not have boarding groups**. This means that there are no specifications as to which passengers board first. [i](#)

In most cases, families with small children, persons with reduced mobility, business class passengers and frequent flyers may board first. However, this should not count here as division into boarding groups.

## 28. I consider the following boarding methods and number of boarding groups to be pleasant when boarding [i](#)

Again, please think of a typical short or medium range aircraft with 20-30 rows, six seats per row (three on each side) and one middle aisle.

For each boarding method and number of boarding groups listed, please indicate to what extent you agree with this statement.

Please judge this in relation to your personal feeling when boarding and not whether the method makes sense to you.

|                                                                                                                                       | completely disagree   |  |                       |                       |                       |                       | completely agree      | I don't know |
|---------------------------------------------------------------------------------------------------------------------------------------|-----------------------|-------------------------------------------------------------------------------------|-----------------------|-----------------------|-----------------------|-----------------------|-----------------------|--------------|
| <u>No division</u> into different boarding groups <a href="#">i</a>                                                                   | <input type="radio"/> | <input type="radio"/>                                                               | <input type="radio"/> | <input type="radio"/> | <input type="radio"/> | <input type="radio"/> | <input type="radio"/> |              |
| <u>Two</u> boarding groups (first the rear half of the aircraft, then the front half)                                                 | <input type="radio"/> | <input type="radio"/>                                                               | <input type="radio"/> | <input type="radio"/> | <input type="radio"/> | <input type="radio"/> | <input type="radio"/> |              |
| <u>Three</u> boarding groups (division of the aircraft into three areas: rear, middle, front)                                         | <input type="radio"/> | <input type="radio"/>                                                               | <input type="radio"/> | <input type="radio"/> | <input type="radio"/> | <input type="radio"/> | <input type="radio"/> |              |
| <u>Three</u> boarding groups (first all window seats, then all middle seats, finally all passengers in aisle seats) <a href="#">i</a> | <input type="radio"/> | <input type="radio"/>                                                               | <input type="radio"/> | <input type="radio"/> | <input type="radio"/> | <input type="radio"/> | <input type="radio"/> |              |
| <u>Four</u> boarding groups                                                                                                           | <input type="radio"/> | <input type="radio"/>                                                               | <input type="radio"/> | <input type="radio"/> | <input type="radio"/> | <input type="radio"/> | <input type="radio"/> |              |
| <u>Five</u> boarding groups or more                                                                                                   | <input type="radio"/> | <input type="radio"/>                                                               | <input type="radio"/> | <input type="radio"/> | <input type="radio"/> | <input type="radio"/> | <input type="radio"/> |              |
| Boarding by rows, starting in the back row                                                                                            | <input type="radio"/> | <input type="radio"/>                                                               | <input type="radio"/> | <input type="radio"/> | <input type="radio"/> | <input type="radio"/> | <input type="radio"/> |              |
| Boarding by seats, each passenger is called individually <a href="#">i</a>                                                            | <input type="radio"/> | <input type="radio"/>                                                               | <input type="radio"/> | <input type="radio"/> | <input type="radio"/> | <input type="radio"/> | <input type="radio"/> |              |

**29. How important are the following things to you in terms of boarding?**

Please indicate the importance of each of the points listed below.

|                                                       | not important<br>at all                                                             | very<br>important     |                       |
|-------------------------------------------------------|-------------------------------------------------------------------------------------|-----------------------|-----------------------|
|                                                       |  |                       | I don't know          |
| To be allowed to get on board as early as possible    | <input type="radio"/>                                                               | <input type="radio"/> | <input type="radio"/> |
| To be able to get in as late as possible              | <input type="radio"/>                                                               | <input type="radio"/> | <input type="radio"/> |
| Not having to get in at the very end                  | <input type="radio"/>                                                               | <input type="radio"/> | <input type="radio"/> |
| To be able to decide for myself when I get in         | <input type="radio"/>                                                               | <input type="radio"/> | <input type="radio"/> |
| To understand why I am in a particular boarding group | <input type="radio"/>                                                               | <input type="radio"/> | <input type="radio"/> |

**30. It is okay for me if the following passengers are allowed to board earlier**

|                                          | completely<br>disagree                                                               | completely<br>agree   |                       |
|------------------------------------------|--------------------------------------------------------------------------------------|-----------------------|-----------------------|
|                                          |  |                       | I don't know          |
| Passengers without carry-on baggage      | <input type="radio"/>                                                                | <input type="radio"/> | <input type="radio"/> |
| Business class passengers                | <input type="radio"/>                                                                | <input type="radio"/> | <input type="radio"/> |
| Families with small children             | <input type="radio"/>                                                                | <input type="radio"/> | <input type="radio"/> |
| Passengers with lots of carry-on baggage | <input type="radio"/>                                                                | <input type="radio"/> | <input type="radio"/> |
| Frequent flyers                          | <input type="radio"/>                                                                | <input type="radio"/> | <input type="radio"/> |
| Elderly passengers                       | <input type="radio"/>                                                                | <input type="radio"/> | <input type="radio"/> |
| People with reduced mobility             | <input type="radio"/>                                                                | <input type="radio"/> | <input type="radio"/> |

## 31. Which of the following statements about the boarding process apply to you?

completely  
disagreecompletely  
agree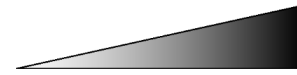

I don't know

For a short total boarding time I would give up on being able to board when I want to.

     


I always follow the instructions when boarding the plane. ((\*|I therefore do not board in an earlier or later boarding group than the one intended for me).

     


It is more important to me to know why I am in a particular boarding group than to have a short personal boarding time.

     


I would describe myself as fast when boarding.

     


It is more important to me to know why I am in a particular boarding group than to have a short total boarding time.

     


I am very satisfied with the boarding process as I usually know it.

     


For a short personal boarding time I would give up on being able to board when I want to.

## Sociodemography

Finally, we would like to ask you for some statistical information.

### 32. In my household there are children under 18 years of age.

[Please choose]

### 33. What is your level of education?

Please select the highest educational degree you have achieved so far.

- Still going to school
- Some High School, no Diploma
- Graduated High School or equivalent qualification
- Some College, no Degree
- Associate Degree, Bachelor's Degree or higher

I don't want to answer that

question('SD06')

### 34. What is your net monthly household income?

This refers to the amount that is made up of all the income of your household and is left after deduction of taxes and social security contributions.

[Please choose]

question('SD07')

### 35. What is your personal annual gross income?

This refers to the amount before deduction of taxes and social security contributions that you receive per year from non-self-employed or self-employed work.

[Please choose]

question('SD08')

**36. What is your year of birth?**

Year of birth:

---

**Seite 19**

---

**Seite 20****37. You have now reached the end of the interview. Are there any points concerning the boarding of aircraft which were not addressed in the questionnaire but which you think should be mentioned?**

Please limit yourself here to 1-2 short sentences or key points.

---

**Seite 21**

---

**Letzte Seite****You have now reached the end of the survey. Thank you for your participation!**

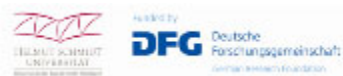

---

boarding2020 → Boarding

03.01.2020, 09:49

**Seite 01**

Liebe Teilnehmerin, lieber Teilnehmer,

zunächst herzlichen Dank, dass Sie an unserer Befragung teilnehmen!

Die Professur für Betriebswirtschaftslehre, insb. Management Science und Operations Research führt diese Befragung im Rahmen eines internationalen Forschungsprojekts durch, welches sich mit dem **Boarden von Flugzeugen** beschäftigt. Hierzu möchten wir im Folgenden gerne von Ihnen wissen, welche Vorlieben und Verhaltensweisen Sie beim **Einsteigen ins Flugzeug** haben.

Ziel ist es, herauszufinden, wie der Boardingprozess in Bezug auf die Zeit und auch auf die Passagierfreundlichkeit verbessert werden kann.

Der Boardingprozess beinhaltet die **Ticket-Kontrolle am Gate** (meist am Automaten mit Drehkreuz), den **Gang durch die Passagierbrücke** zum Flugzeug und das **Einnehmen des Sitzplatzes** im Flugzeug. Der Check-in, die Gepäckaufgabe und die Security-Kontrolle sind nicht Teil dieses Prozesses.

---

**Seite 02**

### 1. Welches Geschlecht haben Sie?

- Weiblich  
 Männlich  
 Anderes

### 2. Alter

Ich bin                      Jahre alt.

---

**Seite 03**

**3. Wie häufig sind Sie in den letzten 12 Monaten geflogen (Hin- und Rückflug zählen jeweils als eigene Flüge)?**

Bitte beantworten Sie die Frage getrennt für private und berufliche Flüge.

Privat: ⓘ

[Bitte auswählen]

Beruflich: ⓘ

[Bitte auswählen]

question('FV03')

## Berufliche Flüge

Sie haben angegeben, in den letzten 12 Monaten nur beruflich geflogen zu sein.

Wir bitten Sie daher, alle folgenden Fragen dieses Fragebogens bezogen auf Ihre **beruflich durchgeführten Flüge** (Geschäftsreisen, Flüge aufgrund Ihrer Berufstätigkeit) zu beantworten.

question('FV02')

## Private Flüge

Sie haben angegeben, in den letzten 12 Monaten nur privat geflogen zu sein.

Wir bitten Sie daher, alle folgenden Fragen dieses Fragebogens bezogen auf Ihre **privat durchgeführten Flüge** (Urlaubsflüge, Flüge mit Familie,...) zu beantworten.

question('FV05')

## Berufliche Flüge

Sie haben angegeben, sowohl privat als auch beruflich zu fliegen. Wir bitten Sie, alle folgenden Fragen dieses Fragebogens bezogen auf Ihre **beruflich durchgeführten Flüge** (Geschäftsreisen, Flüge aufgrund Ihrer Berufstätigkeit) zu beantworten.

question('FV04')

## Private Flüge

Sie haben angegeben, sowohl privat als auch beruflich zu fliegen. Wir bitten Sie, alle folgenden Fragen dieses Fragebogens bezogen auf Ihre **privat durchgeführten Flüge** (Urlaubsflüge, Flüge mit Familie,...) zu beantworten.

**4. Ich fliege überwiegend ...**

- allein
- zu zweit
- in einer Gruppe von maximal 5 Personen
- in einer Gruppe von mindestens 6 Personen

**question('FV07')****5. Ich fliege überwiegend ...**

Bei mehreren Kindern geben Sie bitte das jüngste Kind an

- ohne Kinder
- mit mindestens einem Kind unter 3 Jahren
- mit mindestens einem Kind unter 6 Jahren
- mit mindestens einem Kind unter 12 Jahren
- mit mindestens einem Kind ab 12 Jahren

**6. Ich fliege ...**

- überwiegend Kurz- und Mittelstrecken (maximal ca. 5 Stunden Flugzeit)
- überwiegend Langstrecken (mindestens ca. 5 Stunden Flugzeit)
- etwa gleich oft Kurz- oder Mittelstrecken und Langstrecken

**7. Mit welcher Fluggesellschaft fliegen Sie besonders gerne?**

Wählen Sie bitte maximal drei Fluggesellschaften aus, mit denen Sie am liebsten fliegen.

- Aeroflot
- Air France
- Air India
- American Airlines
- British Airways
- Delta Air Lines
- EasyJet
- El Al
- Emirates
- Ethiopian Airlines
- Eurowings
- Iberia
- JetBlue Airways
- KLM
- Lufthansa
- Norwegian
- Ryanair
- SAS Scandinavian Airlines
- Southwest Airlines
- Spirit Airlines
- SWISS
- Turkish Airlines
- United Airlines
- Wizz Air

Sonstige, und zwar:

---

Das ist mir egal.

**8. Ich fliege überwiegend ...**

- Economy Class 
- Premium Economy Class
- Business Class
- First Class
- Sonstiges, und zwar:

question('FV11')

**9. Wieviel wären Sie bereit, für einen innereuropäischen Flug zu Ihrem Urlaubsziel (z.B. von Frankfurt nach Mallorca oder Vergleichbares) und wieder zurück maximal zu bezahlen?**

[Bitte auswählen]

**10. Wie wichtig sind Ihnen beim Fliegen folgende Faktoren?**

Bitte geben Sie für jeden der aufgeführten Faktoren an, wie wichtig Ihnen dieser ist.

|                                                                                                                                                | völlig<br>unwichtig   |  |                       |                       |                       |                       |                       | sehr<br>wichtig       | kann ich nicht<br>beurteilen |
|------------------------------------------------------------------------------------------------------------------------------------------------|-----------------------|---------------------------------------------------------------------------------------|-----------------------|-----------------------|-----------------------|-----------------------|-----------------------|-----------------------|------------------------------|
| Pünktlichkeit des Fluges                                                                                                                       | <input type="radio"/> | <input type="radio"/>                                                                 | <input type="radio"/> | <input type="radio"/> | <input type="radio"/> | <input type="radio"/> | <input type="radio"/> | <input type="radio"/> |                              |
| Komfort an Bord                                                                                                                                | <input type="radio"/> | <input type="radio"/>                                                                 | <input type="radio"/> | <input type="radio"/> | <input type="radio"/> | <input type="radio"/> | <input type="radio"/> | <input type="radio"/> |                              |
| Schnelles Einsteigen ins Flugzeug                                                                                                              | <input type="radio"/> | <input type="radio"/>                                                                 | <input type="radio"/> | <input type="radio"/> | <input type="radio"/> | <input type="radio"/> | <input type="radio"/> | <input type="radio"/> |                              |
| Direktflug (v.a. bei Kurz- und Mittelstrecken)                                                                                                 | <input type="radio"/> | <input type="radio"/>                                                                 | <input type="radio"/> | <input type="radio"/> | <input type="radio"/> | <input type="radio"/> | <input type="radio"/> | <input type="radio"/> |                              |
| Entertainment                                               | <input type="radio"/> | <input type="radio"/>                                                                 | <input type="radio"/> | <input type="radio"/> | <input type="radio"/> | <input type="radio"/> | <input type="radio"/> | <input type="radio"/> |                              |
| Vielfliegerprogramme                                                                                                                           | <input type="radio"/> | <input type="radio"/>                                                                 | <input type="radio"/> | <input type="radio"/> | <input type="radio"/> | <input type="radio"/> | <input type="radio"/> | <input type="radio"/> |                              |
| Preis                                                                                                                                          | <input type="radio"/> | <input type="radio"/>                                                                 | <input type="radio"/> | <input type="radio"/> | <input type="radio"/> | <input type="radio"/> | <input type="radio"/> | <input type="radio"/> |                              |
| Platz für Handgepäck                                                                                                                           | <input type="radio"/> | <input type="radio"/>                                                                 | <input type="radio"/> | <input type="radio"/> | <input type="radio"/> | <input type="radio"/> | <input type="radio"/> | <input type="radio"/> |                              |
| Service an Bord                                                                                                                                | <input type="radio"/> | <input type="radio"/>                                                                 | <input type="radio"/> | <input type="radio"/> | <input type="radio"/> | <input type="radio"/> | <input type="radio"/> | <input type="radio"/> |                              |
| Verpflegung an Bord                                                                                                                            | <input type="radio"/> | <input type="radio"/>                                                                 | <input type="radio"/> | <input type="radio"/> | <input type="radio"/> | <input type="radio"/> | <input type="radio"/> | <input type="radio"/> |                              |
| Übersichtliche Abläufe während der gesamten Flugabwicklung  | <input type="radio"/> | <input type="radio"/>                                                                 | <input type="radio"/> | <input type="radio"/> | <input type="radio"/> | <input type="radio"/> | <input type="radio"/> | <input type="radio"/> |                              |

Sonstiges, und zwar:

Die folgenden Fragen beziehen sich auf **Kurz- und Mittelstreckenflüge** (bis ca. 5 Stunden Flugzeit), also nicht auf Langstreckenflüge. Üblicherweise haben die hier verwendeten Flugzeuge einen Mittelgang und pro Reihe drei Sitze auf jeder Seite des Gangs.

**question('G002')**

Bitte denken Sie daran, die Fragen nach wie vor bezogen auf Ihre **privat durchgeführten Flüge** (Urlaubsflüge, Flüge mit Familie,...) zu beantworten.

**question('G003')**

Bitte denken Sie daran, die Fragen nach wie vor bezogen auf Ihre **beruflich durchgeführten Flüge** (Geschäftsreisen, Flüge aufgrund Ihrer Berufstätigkeit) zu beantworten.

**11. Mein Hauptgepäckstück ...**

- ... gebe ich am liebsten am Check-In als Aufgabegepäck auf.
- ... nehme ich am liebsten als Handgepäck mit in die Kabine.

---

Es kommt auf den Anlass des Fluges an.

**12. Ich bin bereit, für mein Aufgabegepäck extra zu bezahlen.**

[Bitte auswählen]

**13. Ich bin bereit, für zusätzliches Handgepäck extra zu bezahlen.**

[Bitte auswählen]

**14. Ich habe beim Fliegen in der Regel viel Handgepäck dabei.**

- Ja
- Nein

---

Kann ich nicht beurteilen

**15. Bei einem für mich typischen Flug habe ich üblicherweise folgendes Handgepäck dabei:**

Bitte geben Sie hier an, welche Gepäckstücke Sie in die Flugzeugkabine mitnehmen. Falls dies von Flug zu Flug verschieden ist, denken Sie bitte an Ihren letzten Flug.

Aufgabegepäck, welches am Check-in abgegeben wird, soll hier nicht berücksichtigt werden.

Mehrfachauswahl möglich

- Handgepäckkoffer
- Kleiner Rucksack
- Großer Rucksack
- Handtasche
- Plastiktüte
- Laptoptasche
- Reisetasche
- Sonstiges, und zwar:

**16. Mein Handgepäck ...**

Bitte geben Sie für jede Aussage an, inwiefern Sie dieser zustimmen.

stimme gar  
nicht zu

stimme  
voll zu

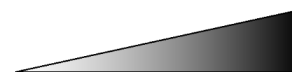

kann ich nicht  
beurteilen

... verstaue ich im Flugzeug am liebsten in den Fächern über den Sitzen.

... verstaue ich im Flugzeug am liebsten unter dem Vordersitz.

... gebe ich, wenn ich dazu aufgefordert werde, auch gern an der Flugzeugtür ab, um es am Zielort am Gepäckband wieder abzuholen. 

... gebe ich, wenn ich dazu aufgefordert werde, auch gern an der Flugzeugtür ab, wenn ich es am Zielort beim Aussteigen direkt an der Flugzeugtür wieder bekomme.

## Sitzplatz im Flugzeug

Bei der Reservierung von Sitzplätzen gibt es verschiedene Varianten bei den einzelnen Fluggesellschaften. Ein Extremfall ist das sogenannte open seating, bei dem es überhaupt keine Reservierungen gibt und sich jeder Passagier beim Einsteigen einfach einen beliebigen Sitzplatz aussuchen darf.

Manche Fluggesellschaften berechnen Zusatzgebühren, wenn man sich bei der Flugbuchung seinen Sitzplatz selbst auswählen möchte und weisen den Passagieren, die nichts extra zahlen möchten, einen beliebigen Sitzplatz zu. Hier kann es dann passieren, dass man nicht neben seinen Mitreisenden sitzen kann.

### 17. Wie wichtig sind Ihnen in Bezug auf den Sitzplatz folgende Dinge?

Bitte geben Sie für jeden der aufgeführten Punkte an, wie wichtig Ihnen dieser ist.

|                                                                                                                    | völlig unwichtig      |  |                       |                       |                       |                       | sehr wichtig          | kann ich nicht beurteilen |
|--------------------------------------------------------------------------------------------------------------------|-----------------------|-------------------------------------------------------------------------------------|-----------------------|-----------------------|-----------------------|-----------------------|-----------------------|---------------------------|
| Einen reservierten Sitzplatz im Flugzeug zu haben                                                                  | <input type="radio"/> | <input type="radio"/>                                                               | <input type="radio"/> | <input type="radio"/> | <input type="radio"/> | <input type="radio"/> | <input type="radio"/> | <input type="radio"/>     |
| Nichts extra für den Sitzplatz zahlen zu müssen                                                                    | <input type="radio"/> | <input type="radio"/>                                                               | <input type="radio"/> | <input type="radio"/> | <input type="radio"/> | <input type="radio"/> | <input type="radio"/> | <input type="radio"/>     |
| Selbst auswählen zu können, ob ich am Fenster, in der Mitte oder am Gang sitze                                     | <input type="radio"/> | <input type="radio"/>                                                               | <input type="radio"/> | <input type="radio"/> | <input type="radio"/> | <input type="radio"/> | <input type="radio"/> | <input type="radio"/>     |
| Meinen genauen Sitzplatz selbst auswählen zu können                                                                | <input type="radio"/> | <input type="radio"/>                                                               | <input type="radio"/> | <input type="radio"/> | <input type="radio"/> | <input type="radio"/> | <input type="radio"/> | <input type="radio"/>     |
| Bereits vor dem Einsteigen ins Flugzeug zu wissen, wo ich sitzen werde                                             | <input type="radio"/> | <input type="radio"/>                                                               | <input type="radio"/> | <input type="radio"/> | <input type="radio"/> | <input type="radio"/> | <input type="radio"/> | <input type="radio"/>     |
| Mindestens eine Stunde vor dem Abflug zu wissen, wo ich sitzen werde                                               | <input type="radio"/> | <input type="radio"/>                                                               | <input type="radio"/> | <input type="radio"/> | <input type="radio"/> | <input type="radio"/> | <input type="radio"/> | <input type="radio"/>     |
| Bitte markieren Sie hier die Antwort „völlig unwichtig“                                                            | <input type="radio"/> | <input type="radio"/>                                                               | <input type="radio"/> | <input type="radio"/> | <input type="radio"/> | <input type="radio"/> | <input type="radio"/> | <input type="radio"/>     |
| Falls ich mit anderen Personen gemeinsam reise, direkt neben meinen Mitreisenden zu sitzen                         | <input type="radio"/> | <input type="radio"/>                                                               | <input type="radio"/> | <input type="radio"/> | <input type="radio"/> | <input type="radio"/> | <input type="radio"/> | <input type="radio"/>     |
| Falls ich mit anderen Personen gemeinsam reise, mit meinen Mitreisenden zusammen ins Flugzeug einsteigen zu können | <input type="radio"/> | <input type="radio"/>                                                               | <input type="radio"/> | <input type="radio"/> | <input type="radio"/> | <input type="radio"/> | <input type="radio"/> | <input type="radio"/>     |

**18. Ich sitze am liebsten ...**

Bitte beantworten Sie die Frage in Hinblick auf ein Flugzeug mit einem Mittelgang und drei Sitzen pro Seite.

Mehrfachauswahl möglich

- ... am Fenster
- ... in der Mitte
- ... am Gang

---

Das ist mir egal.

**19. Ich sitze am liebsten ...**

- ... im vorderen Teil des Flugzeuges
- ... im hinteren Teil des Flugzeuges

---

Das ist mir egal.

**20. Ich bin bereit, für eine Sitzplatzreservierung extra zu bezahlen.**

Stellen Sie sich bitte vor, Sie sind bereits eingeecheckt, haben Ihr Gepäck (wenn gewünscht) bereits aufgegeben, den Sicherheitscheck durchlaufen und haben Ihr Abfluggate erreicht.

**Nun beginnt der Boardingprozess.** Er beinhaltet die Ticket-Kontrolle am Gate (meist an automatischen Drehkreuzen), den Gang über die Passagierbrücke hin zur Flugzeugtür, das Einsteigen ins Flugzeug, das Gepäck verstauen und das Einnehmen des Sitzplatzes im Flugzeug. (**Boarding über Busse wird nicht betrachtet**).

**question('G002')**

Bitte denken Sie daran, die Fragen nach wie vor bezogen auf Ihre **privat durchgeführten Flüge** (Urlaubsflüge, Flüge mit Familie,...) zu beantworten.

**question('G003')**

Bitte denken Sie daran, die Fragen nach wie vor bezogen auf Ihre **beruflich durchgeführten Flüge** (Geschäftsreisen, Flüge aufgrund Ihrer Berufstätigkeit) zu beantworten.

**21. Ich empfinde den Boardingprozess in den meisten Fällen als ...**

Bitte geben Sie für jede aufgeführte Eigenschaft an, inwiefern Sie zustimmen.

|                     | stimme gar<br>nicht zu |                       | stimme<br>voll zu     |                       | kann ich nicht<br>beurteilen |
|---------------------|------------------------|-----------------------|-----------------------|-----------------------|------------------------------|
|                     |                        |                       |                       |                       |                              |
| ... anstrengend     | <input type="radio"/>  | <input type="radio"/> | <input type="radio"/> | <input type="radio"/> | <input type="radio"/>        |
| ... unübersichtlich | <input type="radio"/>  | <input type="radio"/> | <input type="radio"/> | <input type="radio"/> | <input type="radio"/>        |
| ... unangenehm      | <input type="radio"/>  | <input type="radio"/> | <input type="radio"/> | <input type="radio"/> | <input type="radio"/>        |
| ... gut organisiert | <input type="radio"/>  | <input type="radio"/> | <input type="radio"/> | <input type="radio"/> | <input type="radio"/>        |
| ... zeitraubend     | <input type="radio"/>  | <input type="radio"/> | <input type="radio"/> | <input type="radio"/> | <input type="radio"/>        |

**22. Wie wichtig sind Ihnen beim Boarden von Flugzeugen folgende Faktoren?**

Bitte geben Sie für jeden der aufgeführten Faktoren an, wie wichtig Ihnen dieser ist.

völlig  
unwichtigsehr  
wichtig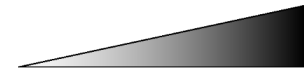kann ich nicht  
beurteilen

Klare und gut verständliche Ansagen

     

Pünktlicher Boardingbeginn (wie auf Bordkarte angegeben)

     

Freundliche Mitarbeiter

     

Gut organisierte Abwicklung des Boardingprozesses

     

Kein langes Warten im Flugzeug (nach dem Hinsetzen)

     

Kein langes Anstehen in den Warteschlangen beim Einsteigen

**23. Stellen Sie sich bitte vor, Sie haben einen festen Sitzplatz und es gibt keine Vorgaben, welche Passagiergruppen zuerst einsteigen dürfen. Wie verhalten Sie sich in der Regel?**

Ich steige am liebsten ...

- ... zu Beginn des Boardingprozesses ins Flugzeug ein.  
 ... gegen Ende des Boardingprozesses ins Flugzeug ein.

Das ist mir egal.

**24. Ich bin bereit, extra zu bezahlen, um bereits vor den anderen regulären Passagieren ins Flugzeug einsteigen zu können.**

[Bitte auswählen]

**25. Das Warten in folgender Situation stört mich sehr.**

Bitte geben Sie für jede aufgeführte Situation an, inwiefern Sie dieser Aussage zustimmen.

|                                                                                                                         | stimme gar<br>nicht zu                                                                |                       | stimme<br>voll zu     |                       | kann ich nicht<br>beurteilen |
|-------------------------------------------------------------------------------------------------------------------------|---------------------------------------------------------------------------------------|-----------------------|-----------------------|-----------------------|------------------------------|
|                                                                                                                         |  |                       |                       |                       |                              |
| Die Wartezeit im Wartebereich am Abfluggate bis das Boarden beginnt (bei <u>planmäßigem</u> Boardingbeginn)             | <input type="radio"/>                                                                 | <input type="radio"/> | <input type="radio"/> | <input type="radio"/> | <input type="radio"/>        |
| Die zusätzliche Wartezeit im Wartebereich am Abfluggate bis das Boarden beginnt (bei <u>verzögertem</u> Boardingbeginn) | <input type="radio"/>                                                                 | <input type="radio"/> | <input type="radio"/> | <input type="radio"/> | <input type="radio"/>        |
| Am Abfluggate in der Schlange vor dem Ticket-Check                                                                      | <input type="radio"/>                                                                 | <input type="radio"/> | <input type="radio"/> | <input type="radio"/> | <input type="radio"/>        |
| In der Passagierbrücke auf dem Weg zum Flugzeug                                                                         | <input type="radio"/>                                                                 | <input type="radio"/> | <input type="radio"/> | <input type="radio"/> | <input type="radio"/>        |
| Im Flugzeug im Mittelgang stehend                                                                                       | <input type="radio"/>                                                                 | <input type="radio"/> | <input type="radio"/> | <input type="radio"/> | <input type="radio"/>        |
| Im Flugzeug auf dem Sitzplatz bis das Flugzeug losrollt                                                                 | <input type="radio"/>                                                                 | <input type="radio"/> | <input type="radio"/> | <input type="radio"/> | <input type="radio"/>        |

---

## 26. Persönliche Wartezeit vs. Gesamtboardingzeit

Unter dem Begriff Boardingzeit kann man sowohl Ihre **persönliche Boardingzeit** verstehen als auch die **Gesamtboardingzeit** des Fluges.

**Persönliche Boardingzeit:** Wartezeit in der Schlange am Gate, in der Brücke und im Flugzeug (stehend oder gehend)

**Gesamtboardingzeit:** persönliche Boardingzeit + Zeit im Wartebereich am Gate sitzend (während andere Passagiere bereits einsteigen) + Zeit im Flugzeug auf dem Sitzplatz sitzend (während andere Passagiere noch einsteigen)

**Angenommen, das Flugzeug startet in jedem Fall pünktlich. Was ist Ihnen lieber?**

- Eine **kurze persönliche** Boardingzeit (die Zeit, die Sie stehend oder gehend in den Warteschlangen verbringen), dafür aber eine **längere Gesamtboardingzeit** (d.h. längeres Sitzen am Gate bzw. im Flugzeug)
- Eine **längere persönliche** Boardingzeit (längeres Stehen am Gate, in der Brücke bzw. im Flugzeuggang), dafür aber eine **kurze Wartezeit** davor und danach

---

Das ist mir egal.

**27. Gehen Sie nun bitte davon aus, dass der Startzeitpunkt des Flugzeugs eventuell beeinflusst wird. Was ist Ihnen lieber:**

- Eine **kurze persönliche** Boardingzeit, dafür aber eine **längere Gesamtboardingzeit** und eventuell ein verspäteter Abflug
- Eine **längere persönliche** Boardingzeit, dafür aber eine **kurze Wartezeit** davor und danach und ein pünktlicher Abflug

---

Das ist mir egal.

Manche Fluggesellschaften lassen die Passagiere in **unterschiedlichen Gruppen** boarden. Abhängig von ihrem Sitzplatz dürfen manche Passagiere früher, manche später einsteigen. Sie haben jedoch auch immer die Möglichkeit, später als für ihre Gruppe vorgesehen einzusteigen.

Bei einer Einteilung in zwei Boardinggruppen steigen z.B. zuerst alle Passagiere ein, die in der hinteren Hälfte des Flugzeuges sitzen und erst danach die Passagiere, die in der vorderen Hälfte ihren Sitzplatz haben.

Bei einigen Fluggesellschaften gibt es jedoch **keine Boardinggruppen**. Das heißt, es gibt keine Vorgaben, welche Passagiere als erstes einsteigen. 

Meist dürfen Familien mit kleinen Kindern, Personen mit eingeschränkter Mobilität, Passagiere aus der Business-Klasse und Vielflieger zuerst einsteigen. Dies soll hier jedoch nicht als Unterteilung in Boardinggruppen zählen.

## 28. Folgende Boardingmethoden und Anzahl Boardinggruppen empfinde ich beim Boarden als angenehm

Bitte denken Sie auch hier wieder an ein typisches Kurz- oder Mittelstreckenflugzeug mit 20-30 Reihen, sechs Sitzen pro Reihe (drei auf jeder Seite) und einem Mittelgang.

Bitte geben Sie für jede aufgeführte Boardingmethode und Anzahl Boardinggruppen an, inwiefern Sie dieser Aussage zustimmen.

Beurteilen Sie dies bitte bezogen auf Ihre persönliche Empfindung beim Boarden und nicht darauf, ob die Methode Ihnen sinnvoll erscheint.

stimme gar  
nicht zu

stimme  
voll zu

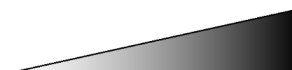

kann ich nicht  
beurteilen

Keine Unterteilung in verschiedene Boardinggruppen 

Zwei Boardinggruppen (erst die hintere Hälfte des Flugzeuges, dann die vordere Hälfte)

Drei Boardinggruppen (Aufteilung des Flugzeuges in drei Bereiche: hinten, Mitte, vorne)

Drei Boardinggruppen (zuerst alle Fensterplätze, dann alle Mittelplätze, zuletzt alle Passagiere auf Gangplätzen) 

Vier Boardinggruppen

Fünf Boardinggruppen oder mehr

Boarding nach Reihen, in der hintersten Reihe beginnend

Boarding nach Sitzplätzen, jeder Passagier wird einzeln aufgerufen 

**29. Wie wichtig sind Ihnen in Bezug auf das Boarden folgende Dinge?**

Bitte geben Sie für jeden der aufgeführten Punkte an, wie wichtig Ihnen dieser ist.

|                                                                | völlig<br>unwichtig   |                       |                       |                       |                       |                       | sehr<br>wichtig |                           |
|----------------------------------------------------------------|-----------------------|-----------------------|-----------------------|-----------------------|-----------------------|-----------------------|-----------------|---------------------------|
|                                                                |                       |                       |                       |                       |                       |                       |                 | kann ich nicht beurteilen |
| Möglichst frühzeitig einsteigen zu dürfen                      | <input type="radio"/> |                 | <input type="radio"/>     |
| Möglichst spät einsteigen zu können                            | <input type="radio"/> |                 | <input type="radio"/>     |
| Nicht ganz am Schluss einsteigen zu müssen                     | <input type="radio"/> |                 | <input type="radio"/>     |
| Selbst entscheiden zu können, wann ich einsteige               | <input type="radio"/> |                 | <input type="radio"/>     |
| Zu verstehen, warum ich in einer bestimmten Boardinggruppe bin | <input type="radio"/> |                 | <input type="radio"/>     |

**30. Für mich ist es in Ordnung, wenn folgende Passagiere früher boarden dürfen**

|                                        | stimme gar<br>nicht zu |                       |                       |                       |                       |                       | stimme<br>voll zu |                           |
|----------------------------------------|------------------------|-----------------------|-----------------------|-----------------------|-----------------------|-----------------------|-------------------|---------------------------|
|                                        |                        |                       |                       |                       |                       |                       |                   | kann ich nicht beurteilen |
| Familien mit kleinen Kindern           | <input type="radio"/>  | <input type="radio"/> | <input type="radio"/> | <input type="radio"/> | <input type="radio"/> | <input type="radio"/> |                   | <input type="radio"/>     |
| Vielflieger                            | <input type="radio"/>  | <input type="radio"/> | <input type="radio"/> | <input type="radio"/> | <input type="radio"/> | <input type="radio"/> |                   | <input type="radio"/>     |
| Passagiere mit viel Handgepäck         | <input type="radio"/>  | <input type="radio"/> | <input type="radio"/> | <input type="radio"/> | <input type="radio"/> | <input type="radio"/> |                   | <input type="radio"/>     |
| Passagiere aus der Business-Klasse     | <input type="radio"/>  | <input type="radio"/> | <input type="radio"/> | <input type="radio"/> | <input type="radio"/> | <input type="radio"/> |                   | <input type="radio"/>     |
| Ältere Passagiere                      | <input type="radio"/>  | <input type="radio"/> | <input type="radio"/> | <input type="radio"/> | <input type="radio"/> | <input type="radio"/> |                   | <input type="radio"/>     |
| Passagiere ohne Handgepäck             | <input type="radio"/>  | <input type="radio"/> | <input type="radio"/> | <input type="radio"/> | <input type="radio"/> | <input type="radio"/> |                   | <input type="radio"/>     |
| Personen mit eingeschränkter Mobilität | <input type="radio"/>  | <input type="radio"/> | <input type="radio"/> | <input type="radio"/> | <input type="radio"/> | <input type="radio"/> |                   | <input type="radio"/>     |

## 31. Welche der nachfolgenden Aussagen zum Boardingprozess treffen für Sie zu?

stimme gar  
nicht zustimme  
voll zu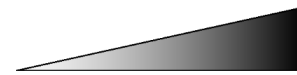kann ich nicht  
beurteilen

Mir ist es wichtiger, zu wissen, warum ich in einer bestimmten Boardinggruppe bin als eine kurze Gesamtboardingzeit zu haben.

     


Mit dem Boardingprozess, wie ich ihn üblicherweise kenne, bin ich sehr zufrieden.

     


Ich halte mich immer an die Anweisungen, wann ich ins Flugzeug einsteigen soll. 

     


Für eine kurze Gesamtboardingzeit verzichte ich darauf, dann einsteigen zu können, wann ich will.

     


Für eine kurze persönliche Boardingzeit verzichte ich darauf, dann einsteigen zu können, wann ich will.

     


Ich würde mich selbst beim Boarden als schnell bezeichnen.

     


Mir ist es wichtiger, zu wissen, warum ich in einer bestimmten Boardinggruppe bin als eine kurze persönliche Boardingzeit zu haben.

## Soziodemografie

Abschließend möchten wir Sie noch um einige statistische Angaben bitten.

### 32. In meinem Haushalt leben Kinder unter 18 Jahren.

[Bitte auswählen]

### 33. Welchen Bildungsabschluss haben Sie?

Bitte wählen Sie den höchsten Bildungsabschluss, den Sie bisher erreicht haben.

- Noch Schüler
- Schule beendet ohne Abschluss
- Hauptschul- oder gleichwertiger Abschluss
- Realschul- oder gleichwertiger Abschluss
- Fachhochschulreife
- Allgemeine Hochschulreife
- Fachhochschul-/Hochschulabschluss oder höher

Ich möchte darauf nicht antworten

question('SD06')

### 34. Wie hoch ist ungefähr Ihr monatliches Haushaltsnettoeinkommen?

Gemeint ist der Betrag, der sich aus allen Einkünften Ihres Haushalts zusammensetzt und nach Abzug der Steuern und Sozialversicherungen übrig bleibt.

[Bitte auswählen]

question('SD07')

### 35. Wie hoch ist ungefähr Ihr persönliches Jahresbruttoeinkommen?

Gemeint ist der Betrag vor Abzug der Steuern und Sozialversicherungen, den Sie im Jahr aus nicht-selbstständiger oder selbstständiger Tätigkeit erhalten.

[Bitte auswählen]

question('SD08')

**36. In welchem Jahr sind Sie geboren?**Geburtsjahr: 

---

**Seite 19**

---

**Seite 20****37. Sie sind nun am Ende der Befragung angekommen. Gibt es noch Punkte beim Boarden von Flugzeugen, die im Fragebogen nicht angesprochen wurden, die Ihrer Meinung nach aber noch erwähnt werden sollten?**

Bitte beschränken Sie sich hier auf 1-2 kurze Sätze oder aussagekräftige Stichpunkte.

---

**Seite 21**

---

**Letzte Seite****Sie sind nun am Ende der Befragung angelangt. Vielen Dank für Ihre Teilnahme!**

---

**Seite 01**

משתתף יקר,

ראשית – תודה רבה על ההשתתפות בסקר!

המחלקה לניהול עסקים, בפרט ניהול מחקרים מדעיים ומבצעיים, עורכת סקר זה כחלק ממחקר בינלאומי העוסק בעלייה למטוס (boarding). אנו נשמח להבין מהן העדפותיך ודפוסי ההתנהגות שלך בעת העלייה למטוס.

מטרת מחקר זה הינה לבחון כיצד ניתן לשפר את תהליך העלייה למטוס הן בהיבט זמנים והן בהיבט נוחות הנוסע.

תהליך העלייה למטוס כולל את **בדיקת הכרטיסים** בשער (בד"כ בדיקת אוטומטית של הכרטיסים בקרוסלה), **ההליכה בגשר הנוסעים** למטוס ומציאת המושב במטוס. תהליך הצ'ק אין לטיסה, מסירת המזוודות והבידוק הביטחוני **אננם** חלק מתהליך זה.

השאלון מנסח בלשון זכר מטעמי נוחות אך מכוון לכל המינים.

---

**Seite 02**

1. **מהו מינך?**

אישה

גבר

אחר

2. **גיל**

אני בן |  שנים.

---

**Seite 03**

3. באיזו תדירות מסת ב-12 חודשים האחרונים (טיסות יוצאות וחזרות) הלוך ושוב) נספרות כטיסות נפרדות)?  
אנא ענה על השאלה בנפרד עבור טיסות פרטיות וטיסות עסקיות (למטרות עבודה).

[אנא בחר]

טיסות פרטיות: ⓘ

[אנא בחר]

טיסות עסקיות (במסגרת עבודה): ⓘ

question('FV03')

**טיסות עסקיות (במסגרת עבודה)**

ציינת שטסת למטרות עבודה בלבד ב-12 החודשים האחרונים.  
לכן, אנו נבקש שתענה על השאלות הבאות בהתייחסות ל**טיסות העסקיות בלבד** (נסיעות עסקיות, טיסות במסגרת עבודתך).

question('FV02')

**טיסות פרטיות**

ציינת שטסת טיסות פרטיות בלבד ב-12 החודשים האחרונים.  
לכן, אנו נבקש שתענה על השאלות הבאות בהתייחסות ל**טיסות הפרטיות בלבד** (חופשות משפחתיות, טיסות לחגים וכדומה).

question('FV05')

**טיסות עסקיות**

ציינת שטסת טיסות פרטיות ועסקיות. נבקש שתענה על השאלות הבאות בהתייחסות ל**טיסות העסקיות בלבד** (נסיעות עסקיות, טיסות במסגרת עבודתך).

question('FV04')

**טיסות פרטיות**

ציינת שטסת טיסות פרטיות ועסקיות. נבקש שתענה על השאלות הבאות בהתייחסות ל**טיסות הפרטיות בלבד** (חופשות משפחתיות, טיסות לחגים וכדומה).

4. אני לרוב מס...

- לבד
- בזוג
- בקבוצה של מקסימום 5 אנשים
- בקבוצה של לפחות 6 אנשים

question('FV07')

**5. אני לרוב טס...**

אם ישנם כמה ילדים, אנה התייחס לצעיר מביניהם

- ללא ילדים
- עם לפחות ילד אחד מתחת לגיל 3 שנים
- עם לפחות ילד אחד מתחת לגיל 6 שנים
- עם לפחות ילד אחד מתחת לגיל 12 שנים
- עם לפחות ילד אחד בגיל 12 שנים ומעלה

**6. אני טס...**

- בעיקר במסלולים באורך קצר עד בינוני (זמן טיסה מקסימלי של כ-7 שעות)
- בעיקר במסלולים ארוכים (לכל הפחות כ-7 שעות טיסה)
- בערך מספר שווה של מסלולים קצרים, בינוניים וארוכים

7. עם איזו חברת תעופה אתה נהגה במיוחד לטוס?  
אנא בחר לכל היותר 3 חברות תעופה עמן אתה מעדיף לטוס.

- Aeroflot
- Air France
- Air India
- American Airlines
- British Airways
- Delta Air Lines
- EasyJet
- El Al
- Emirates
- Ethopian Airlines
- Eurowings
- Iberia
- JetBlue Airways
- KLM
- Lufthansa
- Norwegian
- Ryanair
- SAS Scandinavian Airlines
- Southwest Airlines
- Spirit Airlines
- SWISS
- Turkish Airlines
- United Airlines
- Wizz Air
- אחר, שם:

לא משנה לי.

8. אני לרוב טס...

- מחלקת תיירים **i**
- מחלקת תיירים משודרגת (פרימיום)
- מחלקת עסקים
- מחלקה ראשונה
- אחר, שם:

question('FV11')

9. מהו המחיר המרבי שתהיה מוכן לשלם עבור טיסת הלוך ושוב בתקופת החגים (לדוגמא ת"א- רומא וחזרה)?

[אנא בחר]

10. כמה חשובים עבורך הפרמטרים הבאים?

אנא ציין מה מידת החשיבות עבורך עבור כל אחד מהפרמטרים ברשימה.

|                       | חשוב<br>מאד           | לא חשוב<br>כלל        |                                                   |
|-----------------------|-----------------------|-----------------------|---------------------------------------------------|
| אינני יודע            |                       |                       |                                                   |
| <input type="radio"/> | <input type="radio"/> | <input type="radio"/> | נוחות במטוס                                       |
| <input type="radio"/> | <input type="radio"/> | <input type="radio"/> | השירות על המטוס                                   |
| <input type="radio"/> | <input type="radio"/> | <input type="radio"/> | מחיר                                              |
| <input type="radio"/> | <input type="radio"/> | <input type="radio"/> | עליה מהירה למטוס                                  |
| <input type="radio"/> | <input type="radio"/> | <input type="radio"/> | תכניות "הנוסע המתמיד"                             |
| <input type="radio"/> | <input type="radio"/> | <input type="radio"/> | טיסה ישירה – בייחוד עבור מסלולים באורך קצר-בינוני |
| <input type="radio"/> | <input type="radio"/> | <input type="radio"/> | האוכל שמוגש במטוס                                 |
| <input type="radio"/> | <input type="radio"/> | <input type="radio"/> | נהלים ברורים בכל תהליך העלייה למטוס <b>i</b>      |
| <input type="radio"/> | <input type="radio"/> | <input type="radio"/> | מקום לאחסון תיקי יד ותיקים שעולים עמך למטוס       |
| <input type="radio"/> | <input type="radio"/> | <input type="radio"/> | דיוק הטיסה                                        |
| <input type="radio"/> | <input type="radio"/> | <input type="radio"/> | בידור <b>i</b>                                    |
|                       |                       |                       | אחר, שם:                                          |

השאלות הבאות נוגעות לטיסות במסלול קצר-בינוני (אורך טיסה מקסימלי כ-7 שעות), כלומר: לא לטיסות ארוכות. המטוסים בשימוש עבור טיסות אלו בדרך כלל כוללים מעבר אחד מרכזי בשורה ושלושה מושבים מכל צד של המעבר.

question('G002')

אנא זכור לענות על השאלות בהתייחסות לטיסות הפרטיות שלך (חופשות, טיסות עם המשפחה וכדומה).

question('G003')

אנא זכור לענות על השאלות בהתייחסות לטיסות העסקיות שלך (נסיעות במסגרת עבודה או פעילות מקצועית).

11. בנוגע למזוודה העיקרית שלי (כבודה)...

- אני מעדיף להפקיד את הכבודה לאחסון במטוס.
- אני מעדיף לקחת את הכבודה עמי לטיסה כתיק יד (carry on).

משתנה כתלות בסיבה לטיסה.

12. אני מוכן לשלם תוספת עבור הפקדת המזוודה (כבודה)

[אנא בחר]

13. אני מוכן לשלם תוספת להוספת תיק נוסף שיעלה עמי לטיסה (carry on)

[אנא בחר]

14. בדרך כלל יש לי מספר רב של תיקים (carry on) שעולים עמי למטוס

כן

לא

אינני יודע

**15. בטיסה אופיינית עבורי אני בד"כ לוקח עמי את הפריטים הבאים למטוס (carry on)**

אנא תאר אילו פריטים אתה לוקח עמך למטוס. אם חל שינוי בין טיסה לטיסה, אנא חשוב על טיסתך האחרונה. מזוודות (כבודה) שהופקדו לאחסון ונמסרו בדלפק ההרשמה (צ'ק אין) לטיסה לא נכללות בסעיף זה.

מזוודה קטנה (טרולי)

תיק גב קטן

תיק גב גדול

ארנק

שקית פלסטיק

תיק למחשב נייד

תיק נסיעות

אחר, שם: \_\_\_\_\_

**16. בנוגע לכבודה שעולה עמי למטוס (carry on)...**

אנא תאר את מידת הסכמתך עבור כל הצהרה.

|                       | לחלוטין<br>מסכים      | לחלוטין<br>לא מסכים   |
|-----------------------|-----------------------|-----------------------|
| אינני יודע            |                       |                       |
| <input type="radio"/> | <input type="radio"/> | <input type="radio"/> |
| <input type="radio"/> | <input type="radio"/> | <input type="radio"/> |
| <input type="radio"/> | <input type="radio"/> | <input type="radio"/> |
| <input type="radio"/> | <input type="radio"/> | <input type="radio"/> |

... אני מעדיף להניח בתא האחסון שמעל המושבים.

... אני מעדיף להניח מתחת למושב.

... אשמח למסור את הכבודה בדלת המטוס, אם אתבקש לעשות זאת, ולאסוף אותה במסוף לאיסוף הכבודה כשאגיע ליעד.

...אשמח למסור את הכבודה בדלת המטוס, אם אתבקש לעשות זאת, אם אקבל אותה בחזרה כשאגיע ליעד ישירות בדלת המטוס כשאני יורד מהטיסה.

## מושב בטיסה

ישנן דרכים שונות להזמין מקומות טיסה בחברות תעופה שונות. מקרה קיצוני אחד הוא כביכול "הושבה פתוחה", בו אין הזמנות כלל וכל נוסע יכול לבחור מושב כרצונו בעת העלייה למטוס.

חלק מחברות התעופה גובות תשלום נוסף אם ברצונך לבחור את המושב בעת ההזמנה ומקצות את המושבים הנותרים לנוסעים שלא מעוניינים לשלם תוספת עבור שירות זה. במקרה זה אתה עלול לא לשבת בסמיכות למי שטס עמך.

17. מה רמת החשיבות של הנושאים הבאים בנוגע להושבה במטוס עבורך?

אנא ציין עבור כל אחת מהנקודות הבאות את רמת החשיבות עבורך.

|                       | חשוב<br>מאד           | לא חשוב<br>כלל        |                                                          |
|-----------------------|-----------------------|-----------------------|----------------------------------------------------------|
| אינני יודע            |                       |                       |                                                          |
| <input type="radio"/> | <input type="radio"/> | <input type="radio"/> | שיהיה מושב שמור במטוס                                    |
| <input type="radio"/> | <input type="radio"/> | <input type="radio"/> | ללא תשלום נוסף עבור שמירת המושב                          |
| <input type="radio"/> | <input type="radio"/> | <input type="radio"/> | היכולת לבחור האם אשב בסמיכות לחלון, באמצע או במעבר       |
| <input type="radio"/> | <input type="radio"/> | <input type="radio"/> | היכולת לבחור את המושב המדויק בעצמי                       |
| <input type="radio"/> | <input type="radio"/> | <input type="radio"/> | שאדע היכן אני יושב טרם העלייה למטוס                      |
| <input type="radio"/> | <input type="radio"/> | <input type="radio"/> | שאדע היכן אני יושב לפחות שעה טרם העזיבה (ההמראה)         |
| <input type="radio"/> | <input type="radio"/> | <input type="radio"/> | אם אני נוסע עם אנשים נוספים, לשבת בסמיכות לחבריי הנוסעים |
| <input type="radio"/> | <input type="radio"/> | <input type="radio"/> | אם אני נוסע עם אנשים נוספים, היכולת לעלות למטוס ביחד עמם |

**18. אני מעדיף לשבת ...**

אנא ענה לשאלה בהתייחסות למטוסים עם מעבר מרכזי אחד ושלושה מושבים בכל צד. ניתן לבחור יותר משובה אחת.

... בחלון

... באמצע

... במעבר

לא משנה לי.

**19. אני מעדיף לשבת ...**

... בחלק הקדמי של המטוס

... בחלק האחורי של המטוס

לא משנה לי.

**20. אני מוכן לשלם תוספת עבור הזמנת מושב בטיסה.**

[אנא בחר]

תאר לעצמך שכבר עברת את תהליך ההרשמה לטיסה (צ'ק אין), מסרת את הכבודה לאחסון (אם ברצונך לעשות זאת), עברת את הבידוק הביטחוני והגעת לשער העזיבה של הטיסה.

**כעת, התחיל תהליך העלייה למטוס.** תהליך זה כולל את בקרת הכרטיסים בשער (לרוב נעשה בקרוסלה אוטומטית), חציית גשר הנוסעים לעבר דלת המטוס, עליה אל המטוס, אחסון הכבודה שעמך (תיקי carry on) והושבה במושב במטוס. **(עליה למטוס באמצעות אוטובוסים אינה נכללת כאן).**

question('G002')

אנא זכור לענות על השאלות בהתייחסות לטיסות הפרטיות שלך (חופשות, טיסות עם המשפחה וכדומה).

question('G003')

אנא זכור לענות על השאלות בהתייחסות לטיסות העסקיות שלך (נסיעות במסגרת עבודה או פעילות מקצועית).

## 21. לתפיסתך, תהליך העלייה למטוס ברוב המקרים הינו...

אנא תאר את מידת הסכמתך עבור כל אחד מהמשפטים המתוארים בהמשך.

|                       | להלוטין<br>מסכים      | להלוטין<br>לא מסכים   |                 |
|-----------------------|-----------------------|-----------------------|-----------------|
| אינני יודע            |                       |                       |                 |
| <input type="radio"/> | <input type="radio"/> | <input type="radio"/> | מבלבל ...       |
| <input type="radio"/> | <input type="radio"/> | <input type="radio"/> | מתיש ...        |
| <input type="radio"/> | <input type="radio"/> | <input type="radio"/> | מאורגן היטב ... |
| <input type="radio"/> | <input type="radio"/> | <input type="radio"/> | דורש זמן רב ... |
| <input type="radio"/> | <input type="radio"/> | <input type="radio"/> | לא נעים ...     |

22. כמה חשובים עבורך הגורמים הבאים בעת העלייה למטוס?

אנא תאר את מידת החשיבות עבורך של כל אחד מהגורמים המתוארים בהמשך.

|                       | חשוב<br>מאד           | לא חשוב<br>כלל        |
|-----------------------|-----------------------|-----------------------|
| אינני יודע            |                       |                       |
| <input type="radio"/> | <input type="radio"/> | <input type="radio"/> |
| <input type="radio"/> | <input type="radio"/> | <input type="radio"/> |
| <input type="radio"/> | <input type="radio"/> | <input type="radio"/> |
| <input type="radio"/> | <input type="radio"/> | <input type="radio"/> |
| <input type="radio"/> | <input type="radio"/> | <input type="radio"/> |
| <input type="radio"/> | <input type="radio"/> | <input type="radio"/> |

התנהלות מאורגנת היטב בעת העלייה למטוס

צוות ידידותי

שלא תהיה המתנה ארוכה במטוס (לאחר ההושבה)

שלא יהיו תורים ארוכים בעת העלייה למטוס

שההודעות יהיו ברורות וקלות להבנה

הקפדה על מועד התחלה מדויק של העלייה למטוס (כפי שצוין בכרטיס הטיסה)

23. תאר מצב בו יש לך מושב מוזמן מראש ואין הגבלות בנוגע לאילו קבוצות נוסעים רשאיות לעלות למטוס ראשונות. כיצד אתה מתנהג בדרך כלל? אני מעדיף לעלות על המטוס ...

- ... בתחילת תהליך העלייה למטוס.
- ... לקראת סיומו של תהליך העלייה למטוס.

לא משנה לי.

24. אני מוכן לשלם תוספת כדי שאוכל לעלות למטוס לפני יתר הנוסעים הרגילים.

[אנא בחר]

25. המתנה במצבים הבאים מפריעה לי מאוד.

אנא תאר את מידת הסמתך עבור כל אחד מהמצבים המתוארים.

|                       | לחלוטין מסכים         | לחלוטין לא מסכים      |                                                                                            |
|-----------------------|-----------------------|-----------------------|--------------------------------------------------------------------------------------------|
| אינני יודע            |                       |                       |                                                                                            |
| <input type="radio"/> | <input type="radio"/> | <input type="radio"/> | זמן ההמתנה באזור ההמתנה בשער עד שמתחיל תהליך העלייה למטוס (אם העלייה למטוס מתחילה כמתוכנן) |
| <input type="radio"/> | <input type="radio"/> | <input type="radio"/> | זמן ההמתנה הנוסף בשער עד שמתחיל תהליך העלייה למטוס (אם העלייה למטוס מתעכבת)                |
| <input type="radio"/> | <input type="radio"/> | <input type="radio"/> | בתור בשער טרם בדיקת הכרטיסים                                                               |
| <input type="radio"/> | <input type="radio"/> | <input type="radio"/> | בגשר הנוסעים בדרך למטוס                                                                    |
| <input type="radio"/> | <input type="radio"/> | <input type="radio"/> | עמידה באמצע המעבר במטוס                                                                    |
| <input type="radio"/> | <input type="radio"/> | <input type="radio"/> | בזמן הישיבה במטוס עד ההמראה                                                                |

**26. זמן המתנה אישי לעומת הזמן הכולל של תהליך העלייה למטוס**

המונח זמן העלייה למטוס ניתן להבנה בשני אופנים, הן זמן העלייה האישי שלך והן הזמן הכולל של תהליך העלייה לטיסה.

זמן העלייה האישי: זמן ההמתנה בתור בשער, בגשר הנוסעים ובמטוס (בעמידה או בהליכה).

זמן העלייה הכולל: זמן העלייה האישי + זמן הישיבה באזור ההמתנה בשער (בזמן שנוסעים אחרים כבר התחילו בתהליך העלייה) + זמן הישיבה במושב במטוס (בזמן שנוסעים אחרים עדיין נמצאים בתהליך העלייה למטוס).

**בהנחה שהמטוס ממריא בזמן כמתוכנן בכל מקרה, איזה מהמצבים הבאים היית מעדיף?**

- זמן עלייה אישי קצר יותר (הזמן שאתה מבלה בעמידה או בהליכה בתורים), אך זמן עלייה כולל ארוך יותר (לדוגמה, ישיבה ממושכת יותר בשער או במטוס).
- זמן עלייה אישי ארוך יותר (עמידה ממושכת יותר בשער, בגשר הנוסעים למטוס ובמעבר המרכזי במטוס), אך זמן המתנה קצר יותר לפני כן ולאחר מכן.

לא משנה לי.

**27. עכשיו, הנח שזמן ההמראה של המטוס עשוי להיות מושפע. אילו מהבאים תעדיף?**

- זמן עלייה אישי קצר אך זמן עלייה כולל למטוס ארוך יותר, ייתכן והמראת המטוס תתעכב.
- זמן המתנה אישי ארוך יותר, אך זמן המתנה קצר יותר לפני ואחרי, המראת המטוס בזמן כמתוכנן.

לא משנה לי.

חלק מחברות התעופה מאפשרות לנוסעים לעלות למטוס **בקבוצות שונות**. כתלות במושב, חלק מהנוסעים עשויים לעלות למטוס מוקדם יותר וחלק מאוחר יותר. אולם, תמיד ניתנת להם האפשרות לעלות מאוחר יותר מיתר חברי קבוצתם.

לדוגמה, חלוקה לשתי קבוצות בתהליך העלייה למטוס משמעה שכל הנוסעים היושבים בחלק האחורי של המטוס יעלו ראשונים ורק לאחר מכן נוסעים היושבים בקדמת המטוס יעלו.

אולם, בחלק מחברות התעופה אין חלוקה לקבוצות עלייה למטוס. המשמעות הינה שאין הנחייה הנוגעת לאילו נוסעים יעלו למטוס ראשונים. 

במרבית המקרים, משפחות עם ילדים קטנים, אנשים עם מגבלת ניידות, נוסעי מחלקת עסקים ונוסעים בתכנית "הנוסע המתמיד" רשאים לעלות למטוס ראשונים. אולם, זה לא נכלל בסעיף זה כחלוקה לקבוצות עלייה למטוס.

## 28. בעיניי, שיטת העלייה למטוס הבאה ומספר קבוצות העלייה הן נעימות בעת העלייה למטוס

שוב, אנא חשבו על מטוס נסיעה קצר או בינוני טיפוסי עם 20-30 שורות, שישה מושבים בשורה (שלושה מכל צד) ומעבר מרכזי.

אנא תאר את מידת הסכמתך עם כל אחת מההצהרות הבאות המתארות את שיטת העלייה למטוס ומספר קבוצות העלייה.

אנא ענה לשאלה זו בהתייחסות לתחושתך האישית בעת העלייה למטוס וללא התייחסות להאם שיטה זו הגיונית בעיניך.

|                       | לחלוטין<br>מסכים                                                                  | לחלוטין<br>לא מסכים   |                                                                                                                                                                                                             |
|-----------------------|-----------------------------------------------------------------------------------|-----------------------|-------------------------------------------------------------------------------------------------------------------------------------------------------------------------------------------------------------|
| אינני יודע            |  |                       |                                                                                                                                                                                                             |
| <input type="radio"/> | <input type="radio"/>                                                             | <input type="radio"/> |  ללא חלוקה לקבוצות עלייה למטוס                                                                                           |
| <input type="radio"/> | <input type="radio"/>                                                             | <input type="radio"/> | שתי קבוצות עלייה למטוס (לדוגמה, ראשית הנוסעים היושבים בחלק האחורי של המטוס ולאחר מכן הנוסעים היושבים בקדמת המטוס)                                                                                           |
| <input type="radio"/> | <input type="radio"/>                                                             | <input type="radio"/> | שלוש קבוצות עלייה (חלוקת המטוס לשלושה איזורים - אחורי, אמצעי וקדמי)                                                                                                                                         |
| <input type="radio"/> | <input type="radio"/>                                                             | <input type="radio"/> | שלוש קבוצות עלייה (ראשית הנוסעים היושבים ליד החלון, לאחר מכן נוסעים היושבים במושב האמצעי ולסיום נוסעים היושבים במעבר)  |
| <input type="radio"/> | <input type="radio"/>                                                             | <input type="radio"/> | ארבע קבוצות עלייה                                                                                                                                                                                           |
| <input type="radio"/> | <input type="radio"/>                                                             | <input type="radio"/> | חמש קבוצות עלייה                                                                                                                                                                                            |
| <input type="radio"/> | <input type="radio"/>                                                             | <input type="radio"/> | עלייה לפי מספרי שורות, כאשר מתחילים בחלקו האחורי של המטוס                                                                                                                                                   |
| <input type="radio"/> | <input type="radio"/>                                                             | <input type="radio"/> | עלייה לפי מושבים, כל נוסע ייקרא באופן אישי                                                                             |

29. כמה חשובים הנושאים הבאים עבורך בתהליך העלייה למטוס?

אנא ציין את מידת החשיבות עבורך בנוגע לכל אחת מהנקודות הבאות.

|                       | חשוב<br>מאד           | לא חשוב<br>כלל        |
|-----------------------|-----------------------|-----------------------|
| אינני יודע            |                       |                       |
| <input type="radio"/> | <input type="radio"/> | <input type="radio"/> |
| <input type="radio"/> | <input type="radio"/> | <input type="radio"/> |
| <input type="radio"/> | <input type="radio"/> | <input type="radio"/> |
| <input type="radio"/> | <input type="radio"/> | <input type="radio"/> |
| <input type="radio"/> | <input type="radio"/> | <input type="radio"/> |

שחתאפשר העלייה למטוס מוקדם ככל הניתן

האפשרות להגיע מאוחר ככל הניתן

שלא אצטרך להגיע בסוף התהליך

שאוכל להחליט בעצמי מתי להגיע

להבין מדוע אני בקבוצת עלייה מסוימת למטוס

30. זה בסדר מבחינתי שלנוסעים הבאים תתאפשר קדימות בתהליך העלייה למטוס

|                       | לחלוטין<br>מסכים      | לחלוטין<br>לא מסכים   |
|-----------------------|-----------------------|-----------------------|
| אינני יודע            |                       |                       |
| <input type="radio"/> | <input type="radio"/> | <input type="radio"/> |
| <input type="radio"/> | <input type="radio"/> | <input type="radio"/> |
| <input type="radio"/> | <input type="radio"/> | <input type="radio"/> |
| <input type="radio"/> | <input type="radio"/> | <input type="radio"/> |
| <input type="radio"/> | <input type="radio"/> | <input type="radio"/> |
| <input type="radio"/> | <input type="radio"/> | <input type="radio"/> |
| <input type="radio"/> | <input type="radio"/> | <input type="radio"/> |

נוסעים ללא כבודה שעולה עמם למטוס (תיקי carry on)

אנשים עם מגבלת ניידות

נוסעים במועדון "הנוסע המתמיד"

נוסעים במחלקת עסקים

נוסעים מבוגרים

נוסעים עם כבודה רבה העולה עמם למטוס (מספר רב של תיקי carry on)

משפחות עם ילדים קטנים

## 31. איזה מההצהרות הבאות הנוגעות לתהליך העלייה למטוס חלה עליך?

|                       | להלוטין<br>מסכים                                                                                                                    | להלוטין<br>לא מסכים |                                                                                                                              |
|-----------------------|-------------------------------------------------------------------------------------------------------------------------------------|---------------------|------------------------------------------------------------------------------------------------------------------------------|
| אינני יודע            |                                                                                                                                     |                     |                                                                                                                              |
| <input type="radio"/> | <input type="radio"/> <input type="radio"/> <input type="radio"/> <input type="radio"/> <input type="radio"/> <input type="radio"/> |                     | עבור זמן קצר באופן אישי בתהליך העלייה למטוס אני מוכן לוותר על האפשרות לעלות מתי שארצה.                                       |
| <input type="radio"/> | <input type="radio"/> <input type="radio"/> <input type="radio"/> <input type="radio"/> <input type="radio"/> <input type="radio"/> |                     | אני מאד מרוצה מתהליך העלייה למטוס כפי שאני מכיר אותו בדרך כלל.                                                               |
| <input type="radio"/> | <input type="radio"/> <input type="radio"/> <input type="radio"/> <input type="radio"/> <input type="radio"/> <input type="radio"/> |                     | הידיעה מדוע אני משויך לקבוצה מסוימת בעת העלייה למטוס הינה חשובה יותר עבורי מאשר זמן קצר יותר באופן אישי בתהליך העלייה למטוס. |
| <input type="radio"/> | <input type="radio"/> <input type="radio"/> <input type="radio"/> <input type="radio"/> <input type="radio"/> <input type="radio"/> |                     | עבור זמן קצר באופן כללי בתהליך העלייה למטוס אני מוכן לוותר על האפשרות לעלות מתי שארצה.                                       |
| <input type="radio"/> | <input type="radio"/> <input type="radio"/> <input type="radio"/> <input type="radio"/> <input type="radio"/> <input type="radio"/> |                     | אני מתאר את עצמי כמהיר בעת העלייה למטוס.                                                                                     |
| <input type="radio"/> | <input type="radio"/> <input type="radio"/> <input type="radio"/> <input type="radio"/> <input type="radio"/> <input type="radio"/> |                     | אני תמיד קשוב להנחיות בנוגע לזמן העלייה למטוס.                                                                               |
| <input type="radio"/> | <input type="radio"/> <input type="radio"/> <input type="radio"/> <input type="radio"/> <input type="radio"/> <input type="radio"/> |                     | הידיעה מדוע אני משויך לקבוצה מסוימת בעת העלייה למטוס הינה חשובה יותר עבורי מאשר זמן קצר יותר באופן כללי בתהליך העלייה למטוס. |

**סוציודמוגרפיה (מצב חברתי-דמוגרפי)**

לסיום, נשמח לבקש ממך כמה נתונים עבור מידע סטטיסטי.

32. במשק הבית שלי ישנם ילדים מתחת לגיל 18 שנים.

[אנא בחר]

33. מהי השכלתך?

אנא בחר את התואר הגבוה ביותר שהשגת עד כה.

- עדיין לומד בבית הספר
- בית הספר הסתיים ללא תואר
- סיימתי את לימודי בבית הספר, ללא תעודת בגרות
- השכלה תיכונית לרבות תעודת בגרות
- למדתי באקדמיה (אוניברסיטה או מכללה) ללא תואר
- תואר ראשון, תואר שני ומעלה

אינני מעוניין לענות לשאלה זו

question('SD06')

34. מהי ההכנסה החודשית נשן במשק הבית שלך?

שאלה זו מתייחסת לסכום ההכנסות הכולל של כל תושבי הבית ברמה החודשית, לאחר ניכוי מסים וביטוח לאומי.

[אנא בחר]

question('SD07')

35. מהי ההכנסה השנתית האישית שלך באופן גם?

שאלה זו מתייחסת לסכום שלפני ניכוי מסים וביטוח לאומי שאתה מרוויח ברמה השנתית מעבודה כשכיר או כעצמאי.

[אנא בחר]

question('SD08')

36. באיזו שנה נולדת?

YYYY

שנת לידה:

---

Seite 19

---

Seite 20

37. הגעת כעת לסוף הריאיון. האם ישנן נקודות נוספות הנוגעות לתהליך העלייה למטוס שלא אוזכרו במהלך השאלון ולדעתך יש להתייחס אליהן? אנא הגבל את עצמך ל-1-2 משפטים קצרים המתארים נקודות מפתח משמעותיות.

---

Seite 21

---

Letzte Seite

**הגעת עכשיו לסוף הסקר. תודה על השתתפותך!**

---

פרופ' ד"ר פלוריאן ג'ן, ד"ר סימון נאומן, אוניברסיטת הלמוט שמידט המבורג - 2020

## Variablen-Übersicht

### Fragebogen-Interne Daten

Im Datensatz finden Sie neben Ihren Fragen folgende zusätzliche Variablen, sofern Sie die entsprechende Option beim Herunterladen des Datensatzes nicht deaktivieren.

**CASE** Fortlaufende Nummer der Versuchsperson

**REF** Referenz, falls solch eine im Link zum Fragebogen übergeben wurde

**LASTPAGE** Nummer der Seite im Fragebogens, die zuletzt bearbeitet und abgeschickt wurde

**QUESTNNR** Kennung des Fragebogens, der bearbeitet wurde

**MODE** Information, ob der Fragebogen im Pretest oder durch einen Projektmitarbeiter gestartet wurde

**STARTED** Zeitpunkt, zu dem der Teilnehmer den Fragebogen aufgerufen hat

**FINISHED** Information, ob der Fragebogen bis zur letzten Seite ausgefüllt wurde

**TIME\_001...** Zeit, die ein Teilnehmer auf einer Fragebogen-Seite verbracht hat

Bitte beachten Sie, dass Sie die Fragebogen-internen Variablen nicht mit der Funktion value() auslesen können. Für Interview-Nummer und Referenz stehen aber die PHP-Funktionen [PHP-Funktion caseNumber\(\)](#) und [PHP-Funktion reference\(\)](#) zur Verfügung.

Details über die zusätzlichen Variablen stehen in der Anleitung: [Zusätzliche Variablen in der Datenausgabe](#)

### Section E0: Einleitung

#### Section SD: Soziodemografie

[SD01]  Selection

Geschlecht

"Which gender are you?"

**SD01** Geschlecht

1 = Female

2 = Male

3 = Other

-9 = Not answered

[SD02]  Cloze Text

Alter offen

"Age"

**SD02\_01**  I am ... years old.

Free input (integer)

[SD04]  Dropdown Selection

Kinder Haushalt

"In my household there are children under 18 years of age."

**SD04** Kinder Haushalt

1 = No.

2 = Yes, one.

3 = Yes, two.

4 = Yes, three or more.

-1 = I don't want to answer that

-9 = Not answered

**[SD05]**  Selection  
Formale Bildung (einfach)  
"What is your level of education?"

**SD05** Formale Bildung (einfach)  
1 = Still going to school [1]  
2 = Some High School, no Diploma [2]  
3 = [3]  
4 = [4]  
5 = Graduated High School or equivalent qualification [5]  
6 = Some College, no Degree [6]  
7 = Associate Degree, Bachelor's Degree or higher [7]  
-1 = I don't want to answer that [-1]  
-9 = Not answered

**[SD06]**  Dropdown Selection  
Einkommen privat  
"What is your net monthly household income?"

**SD06** Einkommen privat  
1 = Less than \$1000  
2 = \$1000 to less than \$2000  
3 = \$2000 to less than \$3000  
4 = \$3000 to less than \$4000  
5 = \$4000 to less than \$5000  
6 = \$5000 to less than \$6000  
7 = \$6000 or more  
-1 = I don't want to answer that  
-9 = Not answered

**[SD07]**  Dropdown Selection  
Einkommen beruflich  
"What is your personal annual gross income?"

**SD07** Einkommen beruflich  
1 = I have no personal income  
2 = Less than \$10,000  
3 = \$10,000 to less than \$20,000  
4 = \$20,000 to less than \$30,000  
5 = \$30,000 to less than \$40,000  
6 = \$40,000 to less than \$50,000  
7 = \$50,000 to less than \$60,000  
8 = \$60,000 to less than \$70,000  
9 = \$70,000 to less than \$80,000  
10 = \$80,000 to less than \$90,000  
11 = \$90,000 to less than \$100,000  
12 = \$100,000 or more  
-1 = I don't want to answer that  
-9 = Not answered

**[SD08]**  Text Input  
Alter (Geburtsjahr)  
"What is your year of birth?"

**SD08\_01**  Year of birth  
Free text

## Section FV: Flugverhalten

[FV01]  Scale (fully labeled)

Häufigkeit

"How often have you flown in the last 12 months (round trips count as two flights)?"

**FV01\_01** Private flights: \*

**FV01\_02** Business flights: \*

- 1 = Not at all
- 2 = 1 time
- 3 = 2 times
- 4 = 3 times
- 5 = 4 times
- 6 = 5 times
- 7 = 6 times
- 8 = 7 times
- 9 = 8 times
- 10 = 9 times
- 11 = 10 times or more
- 9 = Not answered

[FV06]  Selection

Gruppe?

"I mostly fly ..."

**FV06** Gruppe?

- 1 = alone
- 2 = as a couple
- 3 = in a group of maximum 5 people
- 4 = in a group of at least 6 people
- 9 = Not answered

[FV07]  Selection

Kinder?

"I mostly fly ..."

**FV07** Kinder?

- 1 = without children
- 2 = with at least one child under the age of 3 years
- 3 = with at least one child under the age of 6 years
- 4 = with at least one child under the age of 12 years
- 5 = with at least one child above the age of 12 years
- 9 = Not answered

[FV08]  Selection

Kurzstrecke?

"I fly ..."

**FV08** Kurzstrecke?

- 1 = mainly short- and medium-distance flights (maximum flight time approx. 7 hours)
- 2 = mainly long-distance flights (at least approx. 7 hours flight time)
- 3 = approx. equal numbers of short- or medium-distance and long-distance flights
- 9 = Not answered

[FV09]  Multiple Choice

Fluggesellschaften

"Which airline do you particularly enjoy flying with?"

**FV09** Fluggesellschaften: Residual option (negative) or number of selected options

-1 = No preference

**FV09\_01** Aeroflot

**FV09\_02** Air France

**FV09\_03** Air India

**FV09\_04** American Airlines

**FV09\_05** British Airways

**FV09\_06** Delta Air Lines

**FV09\_07** EasyJet

**FV09\_08** EI AI

**FV09\_09** Emirates

**FV09\_10** Ethiopian Airlines

**FV09\_11** Eurowings

**FV09\_12** Iberia

**FV09\_13** JetBlue Airways

**FV09\_14** KLM

**FV09\_15** Lufthansa

**FV09\_16** Norwegian

**FV09\_17** Ryanair

**FV09\_18** SAS Scandinavian Airlines

**FV09\_19** Southwest Airlines

**FV09\_20** Spirit Airlines

**FV09\_21** SWISS

**FV09\_22** Turkish Airlines

**FV09\_23** United Airlines

**FV09\_24** Wizz Air

**FV09\_25** Other, namely

1 = Not checked

2 = Checked

**FV09\_25a** Other, namely (free text)

Free text

[FV10]  Selection

Beförderungsklasse

"I mostly fly ..."

**FV10** Beförderungsklasse

1 = Economy Class/Coach \*

2 = Premium Economy Class

3 = Business Class

4 = First Class

5 = Other, namely:

-9 = Not answered

**FV10\_05** Other, namely

Free text

[FV11]  Dropdown Selection

Zahlungsbereitschaft

"What is the maximum amount you would be willing to pay for a round trip domestic flight to your holiday dest..."

**FV11** Zahlungsbereitschaft

1 = less than \$100

2 = \$100 to less than \$200

3 = \$200 to less than \$300

4 = \$300 to less than \$400

5 = \$400 or more

-9 = Not answered

**[FV12]**  Scale (extremes labeled)

Wichtige Faktoren

"How important are the following factors to you when flying?"

**FV12\_01** Direct flight (especially for short- and medium-distance flights)

**FV12\_02** Entertainment \*

**FV12\_03** Clear procedures during the entire flight handling process \*

**FV12\_04** Comfort on board

**FV12\_05** Space for carry-on baggage

**FV12\_06** Price

**FV12\_07** Punctuality of the flight

**FV12\_08** Service on board

**FV12\_09** Catering on board

**FV12\_10** Frequent Flyer Programs

**FV12\_11** Fast boarding of the plane

1 = not important at all

6 = very important

-1 = I don't know

-9 = Not answered

**[FV13]** Text Input

Sonstiger Faktor

**FV13\_01** Other, namely

Free text

## Section G0: Gepäck

**[G004]**  Selection

Gepäckaufgabe

"Concerning my main luggage item ..."

**G004** Gepäckaufgabe

1 = ... I prefer to check it in as checked baggage.

2 = ... I prefer to take it into the cabin as carry-on baggage.

-1 = It depends on the reason for the flight.

-9 = Not answered

**[G005]**  Dropdown Selection

Zahlungsbereitschaft Aufgabegepäck

"I am willing to pay extra for my checked baggage."

**G005** Zahlungsbereitschaft Aufgabegepäck

1 = No.

2 = Yes, under \$5.

3 = Yes, \$5 to under \$10.

4 = Yes, \$10 and more.

-1 = I don't know

-9 = Not answered

**[G006]**  Dropdown Selection

Zahlungsbereitschaft Handgepäck

"I am willing to pay extra for additional carry-on baggage."

**G006** Zahlungsbereitschaft Handgepäck

1 = No.

2 = Yes, under \$5.

3 = Yes, \$5 to under \$10.

4 = Yes, \$10 and more.

-1 = I don't know

-9 = Not answered

[G007]  Selection

Viel Handgepäck

"I usually have a lot of carry-on baggage when I fly."

**G007** Viel Handgepäck

1 = Yes

2 = No

-1 = I don't know

-9 = Not answered

[G008]  Multiple Choice

Anzahl Gepäck

"On a typical flight for me I usually have the following carry-on baggage:"

**G008** Anzahl Gepäck: Residual option (negative) or number of selected options

Integer

**G008\_01** Carry-on baggage suitcase

**G008\_02** Small backpack

**G008\_03** Large backpack

**G008\_04** Purse

**G008\_05** Plastic bag

**G008\_06** Laptop bag

**G008\_07** Travel bag

**G008\_08** Other, namely

1 = Not checked

2 = Checked

**G008\_08a** Other, namely (free text)

Free text

[G009]  Scale (extremes labeled)

Handgepäck

"Concerning my carry-on baggage ..."

**G009\_01** ... I prefer to stow it in the overhead bins above the seats.

**G009\_02** ... I prefer to stow it under the front seat.

**G009\_03** ... I am happy to drop it off at the door of the plane, if I am asked to do so, in order to pick it up again at the baggage claim at my destination. \*

**G009\_04** ... I am happy to drop it off at the door of the plane, if I am asked to do so, if I get it back at my destination directly at the aircraft door when I get off the plane.

1 = completely disagree

6 = completely agree

-1 = I don't know

-9 = Not answered

## Section RE: Sitzplatzreservierung

**[RE02]**  Scale (extremes labeled)

Wichtige Faktoren

"How important are the following aspects to you in regard to seating?"

**RE02\_01** To have a reserved seat on the plane**RE02\_02** No extra charge for the seat**RE02\_03** To be able to choose whether I sit at the window, in the middle or at the aisle**RE02\_04** To be able to choose my seat myself**RE02\_05** Knowing where I will be sitting before boarding the plane**RE02\_06** Knowing where I will be sitting at least an hour before departure**RE02\_09** [No Description] 09**RE02\_07** If I am traveling together with other people, to sit directly next to my fellow traveler**RE02\_08** If I am traveling together with other people, to be able to board the plane together with my fellow travelers

1 = not important at all

6 = very important

-1 = I don't know

-9 = Not answered

**[RE03]**  Multiple Choice

Präferenz wma

"I prefer to sit ..."

**RE03** Präferenz wma: Residual option (negative) or number of selected options

-1 = I don't care.

**RE03\_01** ... at the window**RE03\_02** ... in the middle**RE03\_03** ... at the aisle

1 = Not checked

2 = Checked

**[RE04]**  Selection

Präferenz vorne/hinten

"I prefer to sit ..."

**RE04** Präferenz vorne/hinten

1 = ... in the front part of the plane

2 = ... in the rear of the plane

-1 = I don't care.

-9 = Not answered

**[RE05]**  Dropdown Selection

Zahlungsbereitschaft Sitzplatz

"I am willing to pay extra for a seat reservation."

**RE05** Zahlungsbereitschaft Sitzplatz

1 = No.

2 = Yes, under \$5.

3 = Yes, \$5 to under \$10.

4 = Yes, \$10 and more.

-1 = I don't know

-9 = Not answered

**Section B0: Boarding**

**[B002]**  Scale (extremes labeled)

Empfindung Boarden

"I perceive the boarding process in most cases as ..."

**B002\_01** ... exhausting

**B002\_02** ... unpleasant

**B002\_03** ... time-consuming

**B002\_04** ... confusing

**B002\_05** ... well-organized

1 = completely disagree

6 = completely agree

-1 = I don't know

-9 = Not answered

**[B003]**  Scale (extremes labeled)

Wichtige Faktoren

"How important are the following factors to you when boarding aircraft?"

**B003\_01** Well-organized handling of the boarding process

**B003\_02** Friendly staff

**B003\_03** Punctual start of boarding (as stated on the boarding pass)

**B003\_04** Clear and easily comprehensible announcements

**B003\_05** No long queues when getting in

**B003\_06** No long waiting periods on the plane (after sitting down)

1 = not important at all

6 = very important

-1 = I don't know

-9 = Not answered

**[B004]**  Selection

Zeitpunkt Einstieg

"Please imagine that you have a reserved seat and there are no restrictions on which groups of passengers may..."

**B004** Zeitpunkt Einstieg

1 = ... at the beginning of the boarding process.

2 = ... towards the end of the boarding process.

-1 = I don't care.

-9 = Not answered

**[B005]**  Dropdown Selection

Zahlungsbereitschaft Boarding

"I am willing to pay extra to be able to board the plane before the other regular passengers."

**B005** Zahlungsbereitschaft Boarding

1 = No.

2 = Yes, under \$5.

3 = Yes, \$5 to under \$10.

4 = Yes, \$10 and more.

-1 = I don't know

-9 = Not answered

**[B006]**  Scale (extremes labeled)

Warten Boarding

"Waiting in the following situation bothers me a lot."

**B006\_01** The waiting time in the waiting area at the departure gate until boarding begins (if boarding starts as scheduled)

**B006\_02** The additional waiting time in the waiting area at the departure gate until boarding begins (if boarding is delayed)

**B006\_03** At the departure gate in the queue before the ticket check

**B006\_04** In the passenger bridge on the way to the plane

**B006\_05** Standing in the middle aisle of the airplane

**B006\_06** On my seat in the airplane until take-off

1 = completely disagree

6 = completely agree

-1 = I don't know

-9 = Not answered

**[B007]**  Selection

Indiv. BT vs. Gesamt BT

"Personal waiting time vs. total boarding time"

**B007** Indiv. BT vs. Gesamt BT

1 = A short personal boarding time (the time you spend standing or walking in the queues), but a longer total boarding time (i.e., longer sitting at the gate or in the aircraft)

2 = A longer personal boarding time (longer standing at the gate, in the bridge or in the aircraft in the middle aisle), but a short waiting time before and after

-1 = I don't care.

-9 = Not answered

**[B008]**  Selection

Indiv. BT vs. Gesamt BT Verspätung

"Now please assume that the departure time of the aircraft may be influenced. Which do you prefer:"

**B008** Indiv. BT vs. Gesamt BT Verspätung

1 = A short personal boarding time, but a longer total boarding time and possibly a delayed departure

2 = A longer personal boarding time, but a short waiting time before and after and a departure on time

-1 = I don't care.

-9 = Not answered

**[B009]**  Scale (extremes labeled)

Zufriedenheit

"Which of the following statements about the boarding process apply to you?"

**B009\_01** I am very satisfied with the boarding process as I usually know it.

**B009\_02** I would describe myself as fast when boarding.

**B009\_03** I always follow the instructions when boarding the plane. ((\*|I therefore do not board in an earlier or later boarding group than the one intended for me).

**B009\_04** For a short personal boarding time I would give up on being able to board when I want to.

**B009\_05** For a short total boarding time I would give up on being able to board when I want to.

**B009\_06** It is more important to me to know why I am in a particular boarding group than to have a short personal boarding time.

**B009\_07** It is more important to me to know why I am in a particular boarding group than to have a short total boarding time.

1 = completely disagree

6 = completely agree

-1 = I don't know

-9 = Not answered

## Section BG: Boardinggruppen

**[BG02]**  Scale (extremes labeled)

Anzahl Boardinggruppen

"I consider the following boarding methods and number of boarding groups to be pleasant when boarding \*\*"

**BG02\_01** No division into different boarding groups \***BG02\_02** Two boarding groups (first the rear half of the aircraft, then the front half)**BG02\_03** Three boarding groups (division of the aircraft into three areas: rear, middle, front)**BG02\_04** Three boarding groups (first all window seats, then all middle seats, finally all passengers in aisle seats)\***BG02\_05** Four boarding groups**BG02\_06** Five boarding groups or more**BG02\_07** Boarding by rows, starting in the back row**BG02\_08** Boarding by seats, each passenger is called individually \*

1 = completely disagree

6 = completely agree

-1 = I don't know

-9 = Not answered

**[BG03]**  Scale (extremes labeled)

Wichtigkeit Boardingzeitpunkt

"How important are the following things to you in terms of boarding?"

**BG03\_01** To be allowed to get on board as early as possible**BG03\_02** To be able to get in as late as possible**BG03\_03** Not having to get in at the very end**BG03\_04** To be able to decide for myself when I get in**BG03\_05** To understand why I am in a particular boarding group

1 = not important at all

6 = very important

-1 = I don't know

-9 = Not answered

**[BG04]**  Scale (extremes labeled)

Akzeptanz Boardinggruppen

"It is okay for me if the following passengers are allowed to board earlier"

**BG04\_01** Families with small children**BG04\_02** People with reduced mobility**BG04\_03** Passengers without carry-on baggage**BG04\_04** Passengers with lots of carry-on baggage**BG04\_05** Business class passengers**BG04\_06** Frequent flyers**BG04\_07** Elderly passengers

1 = completely disagree

6 = completely agree

-1 = I don't know

-9 = Not answered

**Section OF: Offene Frage****[OF01]** Text Input

Offene Frage

"You have now reached the end of the interview. Are there any points concerning the boarding of aircraft whic..."

**OF01\_01** [01]

Free text

**Section ID: ID**

**[ID01]** Device and request variables

Panel-ID

**ID01\_RV1** POST/GET Variable: psid

**ID01\_RV2** POST/GET Variable: pid

Text/string
